# Supplementary material for: Stroke genetics informs drug discovery and risk prediction across ancestries
Source: Research Square preprint supplement (doi:10.21203/rs.3.rs-1175817/v1), 2022-01-04
Supplement: Supplementary file 2 [file c83211ce1bb0719c5b684d2b.xlsx]

## Sheet: Suppl.Table1
Supplementary Table 1: Description of the study samples contributing to GIGASTROKE
		Incident only							Incident & prevalent combined
Ancestry	Study	AS	AIS	CES	SVS	LAS	ICH	Controls	AS	AIS	CES	SVS	LAS	ICH	Controls	POPULATION TYPE	Women, %†	Mean age baseline ± SD (years)	Mean age at stroke ± SD (years)
EUR	ARIC_EA*	591	523	172	117	41	49	8241	591	523	172	117	41	49	8241	Population-based, incident	53.06	54.21±5.7	72.28±8.28
	CHS_EA*	653	520	192	79	40	67	2615	653	520	192	79	40	67	2615	Population-based, incident	60.89	72.3±5.4	83.2±6.5
	FHS_EA*	264	214	79	27	124	36	8062	264	214	79	27	124	36	8062	Population-based, incident	54.77	52.48±16.24	77.54±12.77
	EPOZ_EA*	22	NA	NA	NA	NA	NA	382	22	NA	NA	NA	NA	NA	382	Population-based, incident	55.28	70.57±6.42	78.09±6.41
	RS1_EA*	999	603	146	48	64	83	5033	999	603	146	48	64	83	5033	Population-based, incident	60.03	69.18±9.048	81.06±8.021
	RS2_EA*	161	123	24	NA	NA	NA	1911	161	123	24	NA	NA	NA	1911	Population-based, incident	54.92	64.59±7.887	76.17±8.941
	RS3_EA**	60	48	NA	NA	NA	NA	2901	60	48	NA	NA	NA	NA	2901	Population-based, incident	56.64	57.05±6.825	70.40±11.55
	threeCities_EA*	278	218	60	31	NA	51	5977	278	218	60	31	NA	51	5977	Population-based, incident	61.37	74.31±5.40	81.19±5.79
	WGHS_EA*	712	587	NA	NA	NA	NA	22582	712	587	NA	NA	NA	NA	22582	Population-based, incident	100	54.7±7.1	59.9±8.1
	PROSPERlogistic_EA*	193	NA	NA	NA	NA	NA	4413	193	NA	NA	NA	NA	NA	4413	Population-based, incident	53	75.2±3.3	77.8±3.6
	UKBiobank	2932	2211	NA	NA	NA	354	369419	2932	2211	NA	NA	NA	354	369419	Population-based, incident	54.4	56.52±8.09	64.09±7.03
	SHIP*	102	41	NA	NA	NA	NA	1915	102	41	NA	NA	NA	NA	1915	Population-based, incident	54.3	47.0±13.7	61.1±11.7
	MESA*	92	75	NA	NA	NA	NA	2227	92	75	NA	NA	NA	NA	2227	Population-based, incident	52.05	62.70±10.22	70.93±8.21
	EPICCVD*	4795	2535	NA	NA	NA	567	13065	4795	2535	NA	NA	NA	567	13065	Population-based, incident	56.9	64.90± 9.31	65.72±8.48
	HABC*	180	144	45	NA	76	NA	74	180	144	45	NA	76	NA	74	Population-based, incident	46.1	74.08±2.83	81.65±4.73
	SiGN (WHI)**	974	974	229	206	152	NA	8313								Population-based, incident (only, not included in global meta-analysis)	61.03	67.49±10.34	72.55±8.15
	HUNT**	4404	3804	1165	NA	NA	662	65231	4404	3804	1165	NA	NA	662	65231	Population-based, incident	52.97	47.94±16.9	62.30±10.91
	EstBB**	1642	1375	252	488	29	163	33999	1642	1375	252	488	29	163	33999	Population-based, incident	66.6	44.9±17.2	70.7±13.2
	AGES	114	99	NA	NA	NA	NA	2882	114	99	NA	NA	NA	NA	2882	Population-based, incident	58	78.55±5.5	79.9 ±5.5
	GEISINGER**	1184	NA	NA	NA	NA	NA	7484	1184	NA	NA	NA	NA	NA	7484	Population-based, incident	55.22	82.56 (7.79)	69.24±13.17
	CCHS (DK)**	1508	961	224	NA	NA	179	6720	1508	961	224	NA	NA	179	6720	Population-based, incident	55.2	58.5±15.0	65.5±10.9
	DANISH_TR**	85	NA	NA	NA	NA	NA	891	85	NA	NA	NA	NA	NA	891	Population-based, incident	52.8	69.50±7.95	80.27±8.87
	FINRISK**	1193	629	NA	NA	NA	NA	20250	1193	629	NA	NA	NA	NA	20250	Population-based, incident	52.6	48.22±13.19	67.72±10.80
	SMART*	224	174	NA	NA	NA	NA	5735	224	174	NA	NA	NA	NA	5735	Population-based, incident	30.9	67.7±12	68.7±10.5
	ASPREE**	246	191	40	45	52	NA	12553	246	191	40	45	52	NA	12553	Population-based, incident	54.91	75.05±4.21	77.02±4.92
	METASTROKE								10307	10307	1859	1349	1817	NA	19326	Clinic-based case-control study	47.08	64.2±11.12	67.4±12.3
	SIGN								7743	7743	2135	1534	1253	NA	17970	Clinic-based case-control study	46.1	66.45±13.68	67.8±14.5
	DECODE								5520	4483	1346	615	512	NA	254000	Clinic-based case-control study	44.16	66±16.23	78.7±11.6
	Young Lacunar DNA								1403	1268	NA	1012	NA	NA	968	Clinic-based case-control study	32.8	60.15±9.28	60.6±12.4
	SIFAP								981	981	170	104	184	NA	1825	Clinic-based case-control study	38.9	48.45±9.73	41.7±7.4
	INTERSTROKE EUR								911	826	208	243	188	NA	1774	Clinic-based case-control study	44.7	66.8±12.5	67.2±12.8
	HVH1								681	577	92	175	62	NA	1901	Clinic-based case-control study	65.7	67.35±9	68.3±9.0
	HVH2								124	103	28	39	NA	NA		Clinic-based case-control study
	Glasgow								599	599	105	137	72	NA	1775	Clinic-based case-control study	49.04	69.75±8.64	69.9±12.2
	CADISP								555	555	211	31	67	NA	9259	Clinic-based case-control study	38.9	NA	43.73±9.9
	SAHLSIS								298	298	35	85	NA	NA	596	Clinic-based case-control study	40.9	58.05±9.49	59.3±8.6
	MDC								202	202	NA	NA	NA	NA	4925	Clinic-based case-control study	34.7	60.05±6.31	62.9±6.7
	ICH								1545	NA	NA	NA	NA	1545	1481	Clinic-based case-control study	45.1	66.15±9.14	67.0±10
	Generacion**								3279	3279	1444	216	1370	NA	5416	Clinic-based case-control study	51.17	60.52±14.13	73.20±12.45
	German_Ber_Mun_Wur**								4557	4443	663	330	329	NA	7933	Clinic-based case-control study	52.01	64.33±12.05	68.53±14.06
	NL_EA(Future&PSI&Odyssey§)**								2170	2170	32	67	44	NA	2817	Clinic-based case-control study	55.02	57.84±9.12	56.08±12.01
	FINGEN_HOSPITAL**								8979	8097	NA	NA	NA	1238	162569	Clinic-based case-control study	57.32	52.50±18.10	66.17±12.46
	FINGEN_Population**								824	754	NA	NA	NA	121	11857	Clinic-based case-control study	54.66	53.99±15.72	69.27±12.55
	UTARTU-EstBB**								340	340	77	39	75	NA	123854	Clinic-based case-control study	66.2	42.3±13.4	44.7±8.22
TOTAL EUR		23608	16049	2628	1041	578	2211	612875	73652	62100	10804	6811	6399	5115	1234808
EAS	CKBB_ASN (RC12)**	426	NA	NA	NA	NA	NA	6625	426	NA	NA	NA	NA	NA	6625	Population-based, incident	62.4	53.7±10.2	62.6±8.7
	CKBB_ASN (RC16)**	2218	NA	NA	NA	NA	NA	7415	2218	NA	NA	NA	NA	NA	7415	Population-based, incident	61.7	52.8±11.0	59.0±9.6
	CKBB_ASN (RC26)**	449	NA	NA	NA	NA	NA	3858	449	NA	NA	NA	NA	NA	3858	Population-based, incident	63.3	52.8±11.6	62.1±9.3
	CKBB_ASN (RC36)**	295	NA	NA	NA	NA	NA	5909	295	NA	NA	NA	NA	NA	5909	Population-based, incident	59	52.0±10.3	62.1 ±8.8
	CKBB_ASN (RC46)**	400	NA	NA	NA	NA	NA	4700	400	NA	NA	NA	NA	NA	4700	Population-based, incident	60.9	52.6±9.9	61.5 ±8.2
	CKBB_ASN (RC52)**	427	NA	NA	NA	NA	NA	7134	427	NA	NA	NA	NA	NA	7134	Population-based, incident	61.9	51.1±10.5	60.2±8.8
	CKBB_ASN (RC58)**	488	NA	NA	NA	NA	NA	5465	488	NA	NA	NA	NA	NA	5465	Population-based, incident	60.9	49.0±10.7	57.8±9.2
	CKBB_ASN (RC68)**	958	NA	NA	NA	NA	NA	7000	958	NA	NA	NA	NA	NA	7000	Population-based, incident	55.6	49.8±10.2	57.3±9.6
	CKBB_ASN (RC78)**	499	NA	NA	NA	NA	NA	8893	499	NA	NA	NA	NA	NA	8893	Population-based, incident	58.8	53.1±9.9	62.3±8.3
	CKBB_ASN (RC88)**	635	NA	NA	NA	NA	NA	6668	635	NA	NA	NA	NA	NA	6668	Population-based, incident	56.6	51.7±10.7	59.3±9.8
	HISAYAMA_ASN (incident analysis only)	74	46	NA	NA	NA	NA	1880								Population-based, incident (only, not included in global meta-analysis)	60.75	59.4±11.2	71.5±11.1
	KCPS2_ASN**	1489	46	NA	NA	NA	NA	12366	1489	46	NA	NA	NA	NA	12366	Population-based, incident	33.93	46.18±10.99	54.05±11.69
	BIOBANK_JAPAN*								17651	17651	758	4915	1331	NA	159610	Clinic-based case-control study	45.9977	62.8±14.5	69.7±10.1
	HISAYAMA_FSR								1113	1113	137	483	370	NA	901	Clinic-based case-control study	39.1	69.55±10.70	69.7±10.8
	INTERSTROKE_ASN								365	222	31	134	34	NA	698	Clinic-based case-control study	45.6	56.1±13.3	56.1±13.0
TOTAL EAS		8358	92	0	0	0	0	77913	27413	19032	926	5532	1735	0	237242
AFR	ARIC_AA**	298	298	NA	NA	NA	44	2430		298	NA	NA	NA	44		Population-based, incident (not included for prevalent AS, as in COMPASS)	63.22	53.3±5.75	67.16±8.13
	CHS_AA**	153	114	NA	NA	NA	NA	610		114	NA	NA	NA	NA		Population-based, incident (not included for prevalent AS, as in COMPASS)	63.70	72.7±5.6	81.5±6.4
	REGARDS_SIGNET_AA (incident analysis only)**	76	NA	NA	NA	NA	NA	2064								Population-based, incident (not included for prevalent AS, as in COMPASS)	63.9	63.2±8.5	66.1±7.5
	MESA_AA**	67	52	NA	NA	NA	NA	1503	67	52	NA	NA	NA	NA	1503	Population-based, incident	53.58	62.29±10.08	65.43±10.40
	HABC_AA**	160	130	NA	NA	56	NA	210	160	130	NA	NA	56	NA	210	Population-based, incident	57.6	73.68±3.06	80.70±5.13
	JHS_AA (incident analysis only)**	29	NA	NA	NA	NA	NA	1716								Population-based, incident (not included for prevalent AS, as in COMPASS)	36.48	58.35±12.56	58.5±13.0
	INTERSTROKE_AA								NA	122	46	44	32	NA		Population-based, incident (not included for prevalent AS, as in COMPASS)	47.8	57.5±15.1	58.8±15.6
	SIGN_4								NA	NA	118	301	102	NA		Clinic-based case-control study	52.6	63.1±11.68	62±13.0
	SIGN_3								NA	178	77	78	23	NA		Clinic-based case-control study	54.84	40.91±6.94	41.95±6.86
	COMPASS								3734	NA	NA	NA	NA	NA	18317	Clinic-based case-control study	71.25	58.84±10.18	60.73±10.74
TOTAL AFR		783	594	0	0	56	44	8533	3961	894	241	423	213	44	20030
HIS	MESA_HA**	65	52	NA	NA	NA	NA	1227	65	52	NA	NA	NA	NA	1227	Population-based, incident	50.85	61.37±10.28	61.37±10.28
	NOMAS_HA**	89	76	NA	NA	NA	NA	877	89	76	NA	NA	NA	NA	877	Population-based, incident	61.8	64.0±8.0	64.0±8.0
	INTERSTROKE_HA								865	555	99	86	41	NA	1557	Clinic-based case-control study	46.2	65±14.9	66.1±15.0
	JSB_BRAZIL**								497	497	124	121	126	NA	485	Clinic-based case-control study	40.3	61.33±13.74	61.74±13.63
TOTAL HIS		154	128	0	0	0	0	2104	1516	1180	223	207	167	0	4146
SAS	RACE1								1218	1218	229	192	200	NA	1158	Clinic-based case-control study	47.6	51±9.0	50.1±9.9
	RACE2								1167	1167	193	122	155	NA	4035	Clinic-based case-control study	19.6	55.55±11.38	50.2±9.2
	AIIMS_DELHI**								1255	1077	174	333	350	178	2479	Clinic-based case-control study	27.84	49.53±15.29	54.24±13.86
TOTAL SAS									3640	3462	596	647	705	178	7672
Total ALL		32903	16863	2628	1041	634	2255	701425	110182	86668	12790	13620	9219	5337	1503898
NA=Not available; AS=Any stroke; AIS=Any ischemic stroke; CES=Cardioembolic stroke; SVS=Small vessel stroke; LAS=Large artery stroke; ICH=Intracerebral hemorrhage; EUR=Europeans; EAS=East asians; AFR=Africans; HIS=Hispanics; SAS=South asians
*upgraded dataset; **new dataset; all other studies are unchanged compared with MEGASTROKE (European ancestry GWAS meta-analysis publicly available); † in clinic-based case-control studies the % women is reported among stroke patients
§ N PSI = 1,377 cases; N FUTURE = 323 cases; N ODYSSEY = 466 cases)

## Sheet: Suppl.Table2
Supplementary Table 2: Genotyping and imputation characteristics of GIGASTROKE samples
Ancestry	Study	Genotyping platforms - SNP panel	Genotyping center	Genotype calling algorithm	Sample call rate	SNP call rate	MAF*	HWE p-value	Assessment of Population Stratification	Imputation software	Imputation reference panel	GWAS Analysis software	Regression (cox/logistic)	Covariates
EUR	ARIC_EA	Affymetrix GeneChip SNP Array 6.0	Broad Institute, USA	Birdseed	>0.95	>0.95	>0.01	>10-5	EIGENSTRAT	IMPUTE 2	HRC (r1.1, 2016)	ProbABEL	Cox with age as a time scale	Age, Sex, PC1-2, Field Center
	CHS_EA	Illumina 370CNV BeadChip	General Clinical Research Center's Phenotyping / Genotyping Laboratory at Cedars-Sinai, USA	Illumina BeadStudio	>0.95	≥0.97	>0.01	≥10-5	PCA	minimac3	HRC (r1.1, 2016)	R version 3.2.3	Cox with time-to-event as a time scale	Age, sex, clinic/site, PC1-5
	FHS_EA	Affymetrix GeneChip Human Mapping 500K Array +50K Human Gene Focused Panel	Affymetrix (Santa Clara), USA	Affymetrix BRLMM	>0.97	>0.98	≥0.01	>10-6	EIGENSTRAT	MACH v1.0.16	HRC (r1.1, 2016)	R version 2.15.3	Cox with age as a time scale	Age, sex, PC1-4, family structure
	EPOZ_EA	Illumina Infinium Global Screening Array (GSA) v1.0	Erasmus MC, Rotterdam, the Netherlands	GenomeStudio	>0.98	>0.98	NA	>10-4	IBD matrix	minimac3	HRC (r1.1, 2016)	ProbABEL v.0.4.4	Cox with age as a time scale	Age, sex, PC1-2
	RS1_EA	Illumina HumanHap550K(+Duo) and 610-Quad BeadChip	Erasmus MC, Rotterdam, the Netherlands	Illumina Bead Studio	>0.98	>0.98	>0.01	>10-6	IBD matrix	MACH/Minimac (2012.11.16)	HRC (r1.1, 2016)	ProbABEL v.0.4.4	Cox with age as a time scale	Age, Sex
	RS2_EA	Illumina HumanHap550-Duo BeadChip	Erasmus MC, Rotterdam, the Netherlands	Illumina Bead Studio	>0.98	>0.98	>0.01	>10-6	IBD matrix	MACH/Minimac (2012.11.16)	HRC (r1.1, 2016)	ProbABEL v.0.4.4	Cox with age as a time scale	Age, Sex
	RS3_EA	Illumina HumanHap610K-Quad	Erasmus MC, Rotterdam, the Netherlands	Illumina Bead Studio	>0.98	>0.98	>0.01	>10-6	IBD matrix	MACH/Minimac	HRC (r1.1, 2016)	ProbABEL v.0.4.4	Cox with age as a time scale	Age, Sex
	threeCities_EA	Illumina Human 610-Quad BeadChip	Centre National de Génotypage, France	Illumina BeadStudio	>0.95	>0.98	>0.01	>10-6	EIGENSTRAT	MACH (version 1.0), minimac (release 11/16/2012)	HRC (r1.1, 2016)	ProbABEL v. 0.1-3-pacoxph-fix-1	Cox with age as a time scale	Age, Sex, PC1-4
	WGHS_EA	Illumina HumanHap300 Duo "+"	Amgen, Cambridge, MA	Illumina BeadStudio v. 3.0	0.98	0.9		> 10-6	PLINK/EIGENSTRAT	MACH/Minimac	HRC (r1.1, 2016)	ProbABEL	Cox with age as a time scale	Age, PC1-10 (cohort is exclusively female)
	PROSPERlogistic_EA	Illumina 660K BeadChip	Erasmus MC, Rotterdam, Nethelands	Illumina Bead Studio	>0.98	>0.98	>0.01	>10-6	IBD matrix	IMPUTE 2	1000G Phase1v3 all ethnicities	SNPtest	Logistic	Age, sex
	UKBiobank	Applied Biosystems UK BiLEVE Axiom Array by Affymetrix (now part of Thermo Fisher Scientific); Applied Biosystems UK Biobank Axiom Array	Affymetrix Research Services Laboratory	Custom genotype calling pipeline	>0.97	NA	>0.01	>10-7	PCA	IMPUTE4	HRC + UK10K + 1000 Genomes reference panel	PLINK2	logistic	Age, sex, PC1-10, genotyping chip
	SHIP	Affymetrix Genome-Wide Human SNP Array 6.0	Affymetrix (Santa Clara), USA	Birdseed2	>0.92	>0.95	NA	>10-4	PCA and MDS	Eaglev2/Minimac3	HRC (r1.1, 2016)	probabel v. 0.4.4	Cox with age as a time scale	Baseline age, sex, PC1-PC4
	MESA	Affymetrix Human SNP Array 6.0	Affymetrix (Santa Clara), USA	Birdseed2	>0.95	>0.95	>0.05	NA	PCA	University of Michigan imputation server	Haplotype Reference Consortium Release 1	ProbABELv0.5.0	Cox with age as a time scale	Age, sex, PC1-3
	EPICCVD	Illumina Human core exome -24 v1.0	University of Cambridge	Illumina Bead Studio	>0.98	>0.95	NA	>10-6	FlashPCA	IMPUTE v2.3.2	Haplotype Reference Consortium	SNPTEST v2.5.2	Logistic	PC1-3
	HABC	Illumina Human 1M-duo	Center for Inherited Disease Research	Illumina Bead Studio	>0.99	>0.97	>0.01	>10-7	EIGENSTRAT	MACH (version 1.0.16)	HRC (r1.1, 2016)	SNPTEST	Logistic	PC1-10
	SiGN (WHI)	Illumina HumanOmni5Exome-4v1	Center for Inherited Disease Research (CIDR), Johns Hopkins University	GenomeStudio version 2011.1, Genotyping Module 1.9.4, and GenTrain version 1.0	>0.95	>0.99	>0.01	>10-3	PCA	Minimac, Eagle	HRC (r1.1, 2016)	Plink1.9	Logistic	Age, Sex, PC1-10
	HUNT	Illumina HumanCoreExome 12v1.0 Illumina HumanCoreExome 12v1.1 Illumina HumanCoreExome 24 w/custom content	Genomics Core Facility, Norwegian University of Science and Technology (NTNU), Trondheim, Norway	Illumina GenomeStudio	>0.99	>0.99	NA	>10-4	PCA (PLINK)	Minimac 3 (v.2.0.1)	2,201 WGS samples from HUNT plus HRC v.1.1 (with 1,023 HUNT WGS samples removed)	SAIGE v.0.29.4.2 (SAIGE v.0.35.8.3 for model 11)	Logistic	age (baseline), sex. Batch, PC1-PC4
	EstBB	Illumina GSAv1.0, GSAv2.0, and GSAv2.0_EST arrays	Core Genotyping Lab of the Institute of Genomics, University of Tartu	Illumina GenomeStudio	>0.95	>0.95	>0.01	>10-4	PLINK2	Eagle, Beagle	Estonian population specific imputation reference of 2297 WGS samples	ProbABEL	Cox with time-to-event as a time scale	Baseline age, sex, PC1-PC5
	AGES	Illumina HumanCNV370 Duo BeadChip	NIA, NIH, USA	Illumina Bead Studio	>0.97	>0.98	>0.01	>10-6	EIGENSTRAT	MACH v 1.0.16	Backbone 1000G v3 all ethnicities	ProbABEL v0.1-9e	Logistic	Age, sex
	GEISINGER	Illumina OmniExpress Exome array and GSA-24v1-0 array	Regeneron Genomics Center	Illumina GenomeStudio	>0.99	>0.95	>0.01	> 10-7	PLINK2	Eagle v2.3, Minimac4	HRC (r1.1, 2016)	SAIGE	Logistic	Age, sex, PC1-PC5
	CCHS (DK)	Illumina MetaboChip	Department of Clinical Biochemistry, Copenhagen University Hospital - Herlev Gentofte	Illumina GenomeStudio	>0.98	>0.98	NA	>10-6	PLINK(v1.96)	Eagle2,Minimac3	HRC (r1.1, 2016)	SNPtest v.2.5.2	Logistic	Age, sex, PC1-2
	DANISH_TR	Illumina Infinium PsychArray	The SNP&SEQ Technology Platform, Science for Life Laboratory, Uppsala, Sweden (http://snpseq.medsci.uu.se/genotyping/snp-services/)	Illumina GenomeStudio	>0.98	>0.99	NA	>10-6	PCA	IMPUTE2 v. 2.3.2	1000 Genomes phase 3	SNPtest v. 2.5.2	Logistic	Age, Sex, PC1-4
	FINRISK	Illumina HumanCoreExome Illumina 610K Illumina Omni Express	Sanger Institute, Hinxton, UK	Illumina Bead Studio	>95%	>0.98, >0.95, >0.95	MAC>2, >0.01, >0.01	>10-6	MDS	SHAPEIT2 (pre-phasing) and IMPUTE2	1000 Genomes haplotypes -- Phase I integrated	R version 2.15	Logistic	PC1-10, Eastern vs. western FINLAND PC1-10 Sampling weights, PC1-10, FINRISK cohort, Eastern vs. western FINLAND
	SMART	Illumina GSA array	NA	Illumina GenomeStudio	>0.95	0.95	0.001	>10-3	PCA	IMPUTE2	1000 Genomes phase 3 and GoNL v5	SNPtest v.2.5.4	Logistic	Age,sex,PC1-2
	ASPREE	Affymetrix Axiom 2.0 Precision Medicine Diversity Research Array	Ramaciotti Centre for Genomics, UNSW	Custom desgin Script, following best practice genotyping and quality control (QC) protocols from Thermo Fisher	>0.90	>0.90	NA	>10-6	PCA PLINK1.9 & SNPrelate	Minimac4 and Eagle (phasing), Michigan Imputation Server	HRC (r1.1, 2016)	PLINK2	logistic	Age, sex, PC1-3
	METASTROKE-ASGC	Illumina HumanHap610-Quad		Illumina Bead Studio	>95%	>95%	<0.01	< 10-6	PCA	MaCH v1.0.16	1000G Phase1v3 all ethnicities	SNPtest	Logistic	Center, PC1-4
	METASTROKE-BRAINS	Illumina HumanHap610-Quad array.		Illumina Bead Studio	>95%	>95%	<0.01	< 10-6	PCA	MaCH v1.0.16	1000G Phase1v3 all ethnicities	SNPtest	Logistic	Center, PC1-4
	METASTROKE-GEOS	Illumina HumanOmni1-Quad_v1-0_B BeadChip	Johns Hopkins Center for Inherited Disease Research (CIDR)	Illumina Bead Studio	>98%	>98%	<0.01	< 10-6	PCA	MaCH v1.0.16	1000G Phase1v3 all ethnicities	SNPtest	Logistic	Center, PC1-4
	METASTROKE-HPS	Illumina 610K Quad	Centre National de Génotypage in Evry, France	Illumina Bead Studio	>98%	>98%	<0.01	< 10-6	PCA	MaCH v1.0.16	1000G Phase1v3 all ethnicities	SNPtest	Logistic	Center, PC1-4
	METASTROKE-ISGS/SWISS	Illumina 610 or 660 genotyping array		Illumina GenomeStudio	>95%	>95%	<0.01	< 10-5	PCA	MaCH v1.0.16	1000G Phase1v3 all ethnicities	SNPtest	Logistic	Center, PC1-4
	METASTROKE-MGH-GASROS	Affymatrix GeneChip SNP Array 6.0	Broad Institute, USA	Birdseed v2	>0.95	>0.95	NA	NA	EIGENSTRAT	IMPUTE 2.2.2	1000G Phase1v3 all ethnicities	R	Logistic	PC1, PC2
	METASTROKE-MILANO	Illumina Human610-Quad v1_B or Human660W-Quad v1_A chips.		Illumina Bead Studio	>0.95	>0.95	<0.01	< 10-5	EIGENSTRAT	MaCH v1.0.16	1000G Phase1v3 all ethnicities	SNPtest	Logistic	PC1, PC2
	METASTROKE-WTCCC2	Illumina Human660W-Quad		Illumina Bead Studio	>98%	>95%	<0.01	< 10-5	EIGENSTRAT	MaCH v1.0.16	1000G Phase1v3 all ethnicities	SNPtest	Logistic	Center, PC1-4
	METASTROKE-VISP	Illumina HumanOmni1-Quad_v1-0_B BeadChip	Johns Hopkins Center for Inherited Disease Research (CIDR)	Illumina Bead Studio	>98%	>95%	<0.01	< 10-5	EIGENSTRAT	MaCH v1.0.16	1000G Phase1v3 all ethnicities	SNPtest	Logistic	Center, PC1-4
	METASTROKE-WHI	Ilumina Omni-quad	Broad Institute, USA	Birdseed v2	>0.95	>0.95	NA	NA	EIGENSTRAT	IMPUTE 2.2.2	1000G Phase1v3 all ethnicities	R	Logistic	PC1, PC2
	SIGN	Illumina HumanOmni5Exome-4v1	Center for Inherited Disease Research (CIDR), Johns Hopkins University, Baltimore, MD, USA	GenomeStudio version 2011.1	>0.95	>0.99	>0.01	>10-3	PCA	SHAPEIT2 (Pre-Phasing) and IMPUTE2	1000G Phase1	SNPTEST	logistic	PC1-10
	DECODE	Illumina HumanHap and OmniExpress arrays	deCode	Bead Studio	>0.97	>0.95	>0.01	>10-3	NA	Inhouse software at deCode	8.453 WGS Icelanders	Inhouse software at deCode	logistic	County of origin
	Young Lacunar DNA	Illumina HumanCoreExome	UCL genotyping facility, London, UK	GenCall, GenomeStudio	>0.97	>0.97	>0.01	>10-6	EIGENSTRAT	SHAPEIT2 (pre-phasing) and IMPUTE v.2.2.2	1000G Phase1v3 all ethnicities	SNPtest	logistic	PC1-2
	SIFAP	Illumina Human Omni 2.5MQuad array	Center for Inherited Disease Research (CIDR), Johns Hopkins University, Baltimore, MD, USA	Illumina GenomeStudio 2010 v2, genotyping module 1.7.4, Gentrain version 1.0	>0.98	>0.95	>0.01	>10-4	PCA	IMPUTE2	1000 Genomes Phase 1 interim reference panel	SNPTEST	logistic	PC1-5
	INTERSTROKE EUR	HumanExomev1-1/cardiometabochip	Genetic Molecular Epidemiology Laboratory in Hamilton, Ontario, Canada	NA	>0.99	>0.99	>0.01	>10-6	PCA	SHAPEIT v2.r790 (Pre-Phasing) and IMPUTE2 v2.3.2	1000G integrated_phase1_v3.20101123	SNPTEST (v.2.5.2)	logistic	PC1-10
	HVH1	Illumina 370CNV BeadChip (HVH1), Illumina Omni Express (HVH2)	Cedars-Sinai	Illumina Genome Studio	>0.95	<0.97	>0.01	>10-5	R, principal components	MaCH, minimac (release stamp 2012-11-16)	1000G v3 all ethnicities	R	logistic	Age, sex, hypertension, index year, PC1
	HVH2	Illumina 370CNV BeadChip (HVH1), Illumina Omni Express (HVH2)	Cedars-Sinai	Illumina Genome Studio	>0.95	>0.97	>0.01	>10-5	R, principal components	MaCH, minimac (release stamp 2012-11-16)	1000G v3 all ethnicities	R	logistic	Age, sex, hypertension, index year, PC1
	Glasgow	Immunochip	Sanger Institute, Hinxton, Cambridge, UK	GenCall, GenomeStudio	>0.95	>0.95	>0.01	>10-6	EIGENSTRAT	SHAPEIT2 (pre-phasing) and IMPUTE2	1000 Genomes haplotypes -- Phase I integrated	SNPtest v2	logistic	PC1-10
	CADISP	Illumina Human610-Quad or Human660W-Quad	Centre National de Génotypage, Evry, France	Illumina Bead Studio	>0.95	>0.95	>0.01	>10-4	IBD matrix	MaCH and MiniMac2	1000 Genomes reference panel	NA	logistic	NA
	SAHLSIS	Illumina Human Omni 5M array	Broad Institute at Harvard Medical School (Boston, USA)	Illumina Genome Studio	>0.97	>0.95	>0	>10-5	PCA	MaCH (Pre-Phasing) and MiniMac	1000 Genomes haplotypes -- Phase I integrated	NA	logistic	PC1-5
	MDC	Illumina HumanOmniExpressExome BeadChip	NA	Illumina Autocall	>0.95	>0.95	>0.01	>10-6	NA	IMPUTE 2	1000G phase1 (v3) all ethnicities	SNPTEST v2.5	logistic	Age, sex
	ICH	Illumina HumanHap610-Quad / Affymetrix 6.0	Broad Institute, USA	NA	>0.95	>0.95	>0.01	>10-6	PCA	IMPUTE2 v.2.2	1000 G Phase I interim release in NCBI build 37		logistic	PC1-4
	Generacion	Illumina® HumanCore ExomeChip, Illumina® Infimum Multi-Ethnic Global consortium array	Washington University in St. Louis	Illumina GenomeStudio	>0.95	>0.95	>0.01	>10-6	gdsfmt R package	minimac 3, eagle	1000G Phase3 v5	SNPTEST	logistic	Age, sex, PC1-2
	German_Ber_Mun_Wur	Illumina GSA v2	Helmholtz Center Munich	Illumina BeadStudio	>0.95	0.99	>0.01	>10-12	fastpca	minimac 4, EAGLE 2.4	HRC (r1.1, 2016)	PLINK2	logistic	age, sex, PC1-10
	NL_EA	Illumina GSA v2	Utrecht University / Radboud University	Illumina BeadStudio	>0.95	0.99	>0.01	>10-12	fastpca	minimac 4, EAGLE 2.4	HRC (r1.1, 2016)	PLINK2	logistic	age, sex, PC1-10
	FINGEN_HOSPITAL	Illumina, Affymetrix	Institute for Molecular Medicine Finland	GenCall and zCall algorithms for Illumina and AxiomGT1 algorithm for Affymetrix	>0.95	>0.98	MAC>2	>10-6	PCA	Beagle v4.1	SISu v3	SAIGE-0.36.3.2	logistic	sex, age, PC1-10, genotyping batch
	FINGEN_Population	Illumina, Affymetrix	Institute for Molecular Medicine Finland	GenCall and zCall algorithms for Illumina and AxiomGT1 algorithm for Affymetrix	>0.95	>0.98	MAC>2	>10-6	PCA	Beagle v4.1	SISu v3	SAIGE-0.36.3.2	logistic	sex, age, PC1-10, genotyping batch
	UTARTU-EstBB	Illumina GSAv1.0, GSAv2.0, and GSAv2.0_EST arrays	Core Genotyping Lab of the Institute of Genomics, University of Tartu	Illumina GenomeStudio	>0.95	>0.95	>0.01	>10-4	PLINK2	Eagle, Beagle	Estonian population specific imputation reference of 2297 WGS samples	SAIGE-0.43.1	Logistic	Age, sex, PC1-PC5
	TIMI_EUR (for GRS)	NA	Illumina Multi-Ethnic Genotyping Array, Affymetrix Biobank Array, Infinium Global Array	Illumina AutoCall	>0.98	>0.98	>0.01	>10-6	PLINK2	minimac4	TOPMed Freeze5	R	Cox with time-to-event as a time scale	Age, Sex, PC1-5, HTN, hyperlipid, diabetes, smoking, CAD, AF, CHF
EAS	CKBB_ASN (RC12)	Affymetrix Axiom array1/2	BGI, Shenzhen	Axiom Analysis Suite	>0.95	>0.98	>0.01	>10-6	plink	impute 4/shapeit v3	1000 Genomes phase 3	BOLT v2.3.2	Logistic	age, sex, pc1-4, array type
	CKBB_ASN (RC16)	Affymetrix Axiom array1/2	BGI, Shenzhen	Axiom Analysis Suite	>0.95	>0.98	>0.01	>10-6	plink	impute 4/shapeit v3	1000 Genomes phase 3	BOLT v2.3.2	Logistic	age, sex, pc1-4, array type
	CKBB_ASN (RC26)	Affymetrix Axiom array1/2	BGI, Shenzhen	Axiom Analysis Suite	>0.95	>0.98	>0.01	>10-6	plink	impute 4/shapeit v3	1000 Genomes phase 3	BOLT v2.3.2	Logistic	age, sex, pc1-4, array type
	CKBB_ASN (RC36)	Affymetrix Axiom array1/2	BGI, Shenzhen	Axiom Analysis Suite	>0.95	>0.98	>0.01	>10-6	plink	impute 4/shapeit v3	1000 Genomes phase 3	BOLT v2.3.2	Logistic	age, sex, pc1-4, array type
	CKBB_ASN (RC46)	Affymetrix Axiom array1/2	BGI, Shenzhen	Axiom Analysis Suite	>0.95	>0.98	>0.01	>10-6	plink	impute 4/shapeit v3	1000 Genomes phase 3	BOLT v2.3.2	Logistic	age, sex, pc1-4, array type
	CKBB_ASN (RC52)	Affymetrix Axiom array1/2	BGI, Shenzhen	Axiom Analysis Suite	>0.95	>0.98	>0.01	>10-6	plink	impute 4/shapeit v3	1000 Genomes phase 3	BOLT v2.3.2	Logistic	age, sex, pc1-4, array type
	CKBB_ASN (RC58)	Affymetrix Axiom array1/2	BGI, Shenzhen	Axiom Analysis Suite	>0.95	>0.98	>0.01	>10-6	plink	impute 4/shapeit v3	1000 Genomes phase 3	BOLT v2.3.2	Logistic	age, sex, pc1-4, array type
	CKBB_ASN (RC68)	Affymetrix Axiom array1/2	BGI, Shenzhen	Axiom Analysis Suite	>0.95	>0.98	>0.01	>10-6	plink	impute 4/shapeit v3	1000 Genomes phase 3	BOLT v2.3.2	Logistic	age, sex, pc1-4, array type
	CKBB_ASN (RC78)	Affymetrix Axiom array1/2	BGI, Shenzhen	Axiom Analysis Suite	>0.95	>0.98	>0.01	>10-6	plink	impute 4/shapeit v3	1000 Genomes phase 3	BOLT v2.3.2	Logistic	age, sex, pc1-4, array type
	CKBB_ASN (RC88)	Affymetrix Axiom array1/2	BGI, Shenzhen	Axiom Analysis Suite	>0.95	>0.98	>0.01	>10-6	plink	impute 4/shapeit v3	1000 Genomes phase 3	BOLT v2.3.2	Logistic	age, sex, pc1-4, array type
	HISAYAMA_ASN (incident analysis only)	HumanOmniExpressExome BeadChip array	Center for Integrative Medical Science (RIKEN) and Iwate Medical Megabank Organization (Iwate Medical University), Japan	GenomeStudio	>0.98	>0.99	HGC>5	>10-6	GCTA	SHAPEIT2 (pre-phasing) and MiniMac3	1000 Genomes phase 3	ProbABELv0.5.0	Cox with time-to-event as a time scale	Age, Sex, PC1-5
	KCPS2_ASN	Affymetrix GeneChip SNP Array 6.0 (Korean chip)	DNAlink, Korea	Affymetrix BRLMM	>0.95	>0.95	>0.01	>10-4	PCA	IMPUTE4	1000 Genomes reference panel	PLINK2	logistic	Age, sex
	BIOBANK_JAPAN_1	﻿Illumina HumanOmniExpressExome BeadChip or a combination of the Illumina HumanOmniExpress and HumanExome BeadChips	RIKEN GENESIS CO.,LTD.	GenomeStudio	>0.98	>0.99	HGC>5	>10-6	PLINK	Eagle v2.4.1 + Minimac4 v1.0.2	BBJ1k+1KGp3v5	REGENIEv2.0.2	Logistic with approximate Firth correction	age,sex,pc1-10
	BIOBANK_JAPAN_1r (for PGS)	Infinium Asian Screening Array-24 v1.0 BeadChip	RIKEN GENESIS CO.,LTD.	GenomeStudio	>0.98	>0.99	HGC>5	>10-6	PLINK	Eagle v2.4.1 + Minimac4 v1.0.2	BBJ1k+1KGp3v5	NA	NA	NA
	BIOBANK_JAPAN_2 (for PGS)	Infinium Asian Screening Array-24 v1.0 BeadChip	RIKEN GENESIS CO.,LTD.	GenomeStudio	>0.98	>0.99	HGC>5	>10-6	PLINK	Eagle v2.4.1 + Minimac4 v1.0.2	BBJ1k+1KGp3v5	NA	NA	NA
	HISAYAMA_FSR	HumanOmniExpressExome BeadChip array	Center for Integrative Medical Science (RIKEN) and Iwate Medical Megabank Organization (Iwate Medical University), Japan	GenomeStudio	>0.95	>0.99	>0.01	>10-6	PCA	SHAPEIT2 (pre-phasing) and MiniMac3	1000 Genomes phase 3	NA	Logistic	PC1-2
	INTERSTROKE_ASN	HumanExomev1-1/cardiometabochip	Genetic Molecular Epidemiology Laboratory in Hamilton, Ontario, Canada	NA	>0.99	>0.99	>0.01	>10-6	PCA	SHAPEIT v2.r790 (Pre-Phasing) and IMPUTE2 v2.3.2	1000G integrated_phase1_v3.20101123	SNPTEST (v.2.5.2)	Logistic	PC1-10
	TOHUKU_MEGABANK (for MR, LDSC, and PGS [risk factor GWAS])	Axiom customized genotyping array designed by the TMM (Japonica array version 2)	Tohoku University Tohoku Medical Megabank Org. (ToMMo), JPN	GeneTitan, ThermoFisher Scientific	>0.95	>0.95	>0.01	>10-5	PLINK	Eagle v2.4.1 + Minimac3 v2.0.1	1000G Phase3v5 (cross-ancestry)	BOLT-LMM v2.3.4	Linear regression with LMM for stroke risk factors	Age, Sex, PC1-10
	TIMI_EAS (for GRS)	NA	Illumina Multi-Ethnic Genotyping Array, Affymetrix Biobank Array, Infinium Global Array	Illumina AutoCall	>0.98	>0.98	>0.01	>10-6	PLINK2	minimac4	TOPMed Freeze5	R	Cox with time-to-event as a time scale	Age, Sex, PC1-5, HTN, hyperlipid, diabetes, smoking, CAD, AF, CHF
AFR	ARIC_AA	Affymetrix GeneChip SNP Array 6.0	Broad Institute, USA	Birdseed	>0.95	>0.95	>0.01	>10-5	EIGENSTRAT	IMPUTE 2	1000G Phase1v3 all ethnicities	ProbABEL	Cox with age as a time scale	Age, Sex, PC1-4
	CHS_AA	Illumina Human Omni1-Quad v1 BeadChip	General Clinical Research Center's Phenotyping / Genotyping Laboratory at Cedars-Sinai, USA	Illumina GenomeStudio	>0.95	≥0.97	>0.01	≥10-5	PCA	minimac3	HRC (r1.1, 2016)	R version 3.2.3	Cox with time-to-event as a time scale	Age, sex, clinic/site, PC1-5
	REGARDS_SIGNET_AA (incident analysis only)	Affymetrix Genome-Wide Human SNP Array 6.0.	NA	Birdseed2	>0.95	>0.95	>0.05	NA	PCA	University of Michigan imputation server	1,000 Genomes Phase 1	SNPTEST	Logistic	Age, Sex, PC1-10
	MESA_AA	Affymetrix Human SNP Array 6.0	Affymetrix (Santa Clara), USA	Birdseed2	>0.95	>0.95	>0.05	NA	PCA	University of Michigan imputation server	1,000 Genomes Phase 1	ProbABELv0.5.0	Cox with age as a time scale	Age, sex, PC1
	HABC_AA	Illumina Human1M-Duov3_B	Center for Inherited Disease Research	Illumina Bead Studio	>0.95	>0.95	NA	NA	PLINK2	University of Michigan imputation server	Consortium on Asthma among African-ancestry Populations in the Americas (CAAPA) panel	Plink1.9	Logistic	Age, Sex, PC1-10
	JHS_AA (incident analysis only)	Affymetrix GeneChip SNP Array 6.0	NA	Birdseed2	>0.90	>0.90	>0.01	>10-6	PCA	University of Michigan imputation server	1000G Phase3v5	EPACTS 3.2.6	Logistic	Age, Sex, PC1-10
	INTERSTROKE_AA	HumanExomev1-1/cardiometabochip	Genetic Molecular Epidemiology Laboratory in Hamilton, Ontario, Canada	NA	>0.99	>0.99	>0.01	>10-6	PCA	SHAPEIT v2.r790 (Pre-Phasing) and IMPUTE2 v2.3.2	1000G integrated_phase1_v3.20101123	SNPTEST (v.2.5.2)	Logistic	PC1-10
	SIGN_4	Illumina HumanOmni5Exome-4v1	Center for Inherited Disease Research (CIDR), Johns Hopkins University, Baltimore, MD, USA	GenomeStudio version 2011.1	>0.95	>0.99	>0.01	>10-3	PCA	SHAPEIT2 (Pre-Phasing) and IMPUTE2	1000G Phase1	SNPTEST	logistic	PC1-10
	SIGN_3	Illumina HumanOmni5Exome-4v1	Center for Inherited Disease Research (CIDR), Johns Hopkins University, Baltimore, MD, USA	GenomeStudio version 2011.1	>0.95	>0.99	>0.01	>10-3	PCA	SHAPEIT2 (Pre-Phasing) and IMPUTE2	1000G Phase1	SNPTEST	logistic	PC1-10
	TIMI_AFR (for GRS)	NA	Illumina Multi-Ethnic Genotyping Array, Affymetrix Biobank Array, Infinium Global Array	Illumina AutoCall	>0.98	>0.98	>0.01	>10-6	PLINK2	minimac4	TOPMed Freeze5	R	Cox with time-to-event as a time scale	Age, Sex, PC1-5, HTN, hyperlipid, diabetes, smoking, CAD, AF, CHF
HIS	MESA_HA	Affymetrix Human SNP Array 6.0	Affymetrix (Santa Clara), USA	Birdseed2	>0.95	>0.95	>0.05	NA	PCA	University of Michigan imputation server	1,000 Genomes Phase	ProbABELv0.5.0	Cox with age as a time scale	Age, sex, PC1-3
	NOMAS_HA	Affymetrix GeneChip SNP Array 6.0	Hussman Institute for Human Genomics	Affymetrix Power Tools	>0.95	>0.95	>0.01	>10-6	EIGENSTRAT	IMPUTE 2	1000G Phase1v3 all ethnicities	PLINK	Logistic	Age, sex, PC1-3
	INTERSTROKE_HA	HumanExomev1-1/cardiometabochip	Genetic Molecular Epidemiology Laboratory in Hamilton, Ontario, Canada	NA	>0.99	>0.99	>0.01	>10-6	PCA	SHAPEIT v2.r790 (Pre-Phasing) and IMPUTE2 v2.3.2	1000G integrated_phase1_v3.20101123	SNPTEST (v.2.5.2)	Logistic	PC1-10
	JSB_BRAZIL	Axiom_PMRA.r1	McGill Genome Centre	AxiomGT1 algorithm	>0.95	>0.98	NA	>10-6	PLINK	University of Michigan imputation server	1000G Phase3v5 (AMR)	REGENIE	Logistic mixed model	Age, sex, PC1-4
SAS	RACE1	Illumina 660W-Quad BeadChip and Illumina Human Omni Express	Center for Inherited Disease Research (CIDR), Johns Hopkins University, Baltimore, MD, USA	NA	>0.95	>0.99	>0.01	>10-3	EIGENSTRAT	SHAPEIT2 (Pre-Phasing) and IMPUTE2	1000G Phase 1	SNPTEST	Logistic	PC1-10
	RACE2	Illumina 660W-Quad BeadChip and Illumina Human Omni Express	Center for Inherited Disease Research (CIDR), Johns Hopkins University, Baltimore, MD, USA	NA	>0.95	>0.99	>0.01	>10-3	EIGENSTRAT	SHAPEIT2 (Pre-Phasing) and IMPUTE2	1000G Phase 1	SNPTEST	Logistic	PC1-10
	AIIMS_DELHI	Illumina genome screen array version 2.0	Outsourced to private company	Illumina Genome Studio	>0.95	>0.95	>0.01	>10-5	EIGENSOFT v7.2.1	TOPMedimputationserver	TOPMed vR2	GCTA	Generalized mixed model	Age, sex, PC1-10
NA=Not applied a specific threshold or information not available; EUR=Europeans; EAS=East asians; AFR=Africans; HIS=Hispanics; SAS=South asians; MAF=Minor allele frequency; MAC=Minor allele count; HGC=Heterozygous genotype count; HWE=Hardy-Weinberg equilibrium; HRC=Haplotype reference consortium; PC=Principal component; MR=Mendelian randomization; LDSC=LD-score regression; PGS=polygenic risk score
* Instead of filtering variants on minor allele frequncy, few studies filter on minor allele count (MAC) or heterozygous genotype count (HGC)

## Sheet: Suppl.Table3
Supplementary Table 3A: Lambda values for individual GWAS
Ancestry	Study	AS	AIS	SVS	CES	LAS	ICH
EUR	ARIC_EA	1.007	1.008	1.006	1.004	1.017	0.991
	CHS_EA	1.022	1.01	1.013	1.006	1.008	1.013
	FHS_EA	1.031	1.023	1.029	1.031	1.019	1.025
	EPOZ_EA	1.019	NA	NA	NA	NA	NA
	RS1_EA	1.014	1.011	1.008	1.016	0.977	1.011
	RS2_EA	1.03	1.019	NA	1.019	NA	NA
	RS3_EA	0.989	1.023	NA	NA	NA	NA
	threeCities_EA	1.003	1.003	1.014	1.011	NA	1.024
	WGHS_EA	1.003	0.993	NA	NA	NA	NA
	PROSPERlogistic_EA	1.011	NA	NA	NA	NA	NA
	UKBiobank	1.008	1.009	NA	NA	NA	1.003
	SHIP	1.014	1.008	NA	NA	NA	NA
	MESA	0.997	1	NA	NA	NA	NA
	EPICCVD	1.007	1.032	NA	NA	NA	1.13
	HABC	0.973	0.948	NA	0.854	0.928	NA
	SiGN (WHI)	1.01449	1.01449	0.988	1.021		NA
	HUNT	1.025	1.03	NA	1.026	NA	1.017
	EstBB	1.022	1.025	1	1.016	1.001	1.017
	AGES	1.017	1.001	NA	NA	NA	NA
	GEISINGER	0.886	NA	NA	NA	NA	NA
	CCHS (DK)	1.002	1.012	NA	1.004	NA	1.003
	DANISH_TR	1.045	NA	NA	NA	NA	NA
	FINRISK	1.062	1.092	NA	NA	NA	NA
	SMART	1.001	0.998	NA	NA	NA	NA
	ASPREE	0.993	0.997	1.017	0.987	1.004	NA
	MEGASTROKE_nonoverlapping	1.067	1.067	1.1	1.082	1.114	1.009
	Generacion	0.974	0.974	1.008	0.958	0.936	NA
	German_Ber_Mun_Wur	1.129	1.128	1.066	1.053	1.038	NA
	NL_EA	0.993	0.993	1.022	1.073	1.073	NA
	FINGEN_HOSPITAL	1.044	1.041	NA	NA	NA	1.017
	FINGEN_Population	0.998	1.001	NA	NA	NA	1.021
	UTARTU-EstBB	1.011	1.011	1.011	0.99	1.017	NA
EAS	CKBB_ASN (RC12)	1.002	NA	NA	NA	NA	NA
	CKBB_ASN (RC16)	1.004	NA	NA	NA	NA	NA
	CKBB_ASN (RC26)	1.001	NA	NA	NA	NA	NA
	CKBB_ASN (RC36)	1.003	NA	NA	NA	NA	NA
	CKBB_ASN (RC46)	0.994	NA	NA	NA	NA	NA
	CKBB_ASN (RC52)	1.003	NA	NA	NA	NA	NA
	CKBB_ASN (RC58)	0.996	NA	NA	NA	NA	NA
	CKBB_ASN (RC68)	1.004	NA	NA	NA	NA	NA
	CKBB_ASN (RC78)	1.006	NA	NA	NA	NA	NA
	CKBB_ASN (RC88)	1.002	NA	NA	NA	NA	NA
	HISAYAMA_ASN (incident analysis only)	0.987489		NA	NA	NA	NA
	KCPS2_ASN	1.011	1.006	NA	NA	NA	NA
	BIOBANK_JAPAN	1.084	1.084	1.026	0.999	1.023	NA
	HISAYAMA_FSR	1.012	1.012	NA	1.02	NA	NA
	INTERSTROKE_ASN	1.068	1.037	1	1.01	1.045	NA
AFR	ARIC_AA	NA	1.012	NA	NA	NA	NA
	CHS_AA	NA	1.043	NA	NA	NA	NA
	REGARDS_SIGNET_AA (incident analysis only)	1.00772	NA	NA	NA	NA	NA
	MESA_AA	1.012	1.007	NA	NA	NA	NA
	HABC_AA	1.113	1.087	NA	NA	1.016	NA
	JHS_AA (incident analysis only)	1.0044	NA	NA	NA	NA	NA
	INTERSTROKE_AA	NA	1.068	1.074	1.081	1.061	NA
	SIGN_4	NA	NA	1.003	0.997	1.008	NA
	SIGN_3	NA	NA	1.047	1.036	1.059	NA
	COMPASS	1.04	NA	NA	NA	NA	NA
HIS	MESA_HA	1.03	1.02	NA	NA	NA	NA
	NOMAS_HA	1.008	1.01	NA	NA	NA	NA
	INTERSTROKE_HA	1.122	0.998	1.088	1.024	1.024	NA
	JSB_BRAZIL	1.023	1.023	0.994	0.947	1.017	NA
SAS	RACE1	1.014	1.014	1.028	1.033	1.014	NA
	RACE2	0.943	0.943	0.956	0.974	0.99	NA
	AIIMS_DELHI	0.999	0.997	1	0.987	1.003	NA
NA=Not available; AS=Any stroke; AIS=Any ischemic stroke; CES=Cardioembolic stroke; SVS=Small vessel stroke; LAS=Large artery stroke; ICH=Intracerebral hemorrhage; EUR=Europeans; EAS=East asians; AFR=Africans; HIS=Hispanics; SAS=South asians
Supplementary Table 3B: LD Scrore regression intercepts of ancestry specific meta-analysis of GWAS
Ancestry	AS	AIS	SVS	CES	LAS	ICH
EUR	1.1	1.1	1.08	1.06	1.09	1.02
EAS	0.99	0.97	1	1.02	1.02	NA
AFR	1.07	NA	1.02	0.98	0.97	NA
HIS	1.12	1	1.03	0.91	1.05	NA
SAS	0.96	0.96	0.94	1.01	1.1	NA
NA suggest the GWAS is unavailble or the study is undepowered to run LD scrore regression.
Supplementary Table 3C: The SNP-heritability estimates on observed scale from Cov-LDSC
Ancestry	AS	AIS	SVS	CES	LAS	ICH
EUR	4.8E-3 (5E-4)	4.9E-3 (5E-4)	3.3E-3 (1.1E-3)	7.4E-3 (1.2E-3)	2E-3 (1.2E-3)	4E-4 (6E-4)
EAS	0.03 (9.8E-3)	0.05 (0.02)	0.05 (0.02)	7.9E-3 (0.02)	0.03 (0.02)	NA
AFR	-0.01 (0.09)	NA	0.57 (0.75)	0.54 (0.55)	-0.41 (1.03)	NA
HIS	0.29 (0.31)	0.52 (0.48)	-0.28 (0.96)	2.38 (1.11)	9.5E-3 (0.84)	NA
SAS	0.02 (0.21)	0.02 (0.21)	0.71 (0.49)	-0.15 (0.37)	-1.23 (0.51)	NA
NA suggest the GWAS is unavailble or the study is undepowered to run LD scrore regression.

## Sheet: Suppl.Table4
Supplementary Table 4: Genome-wide significant stroke risk loci identified in the GWAS meta-analysis using METAL
SNP ID	coordinates	Phenotype		Ancestry		Old_Novel	Gene	Function	EA/OA	EAF	OR	95%CI	P-value	N_EVENT/TOTAL
		Main*	Other	Main†	Other
rs16998073	4:81184341	AIS	AS	CROSS-ANC	EAS (AS),	NOVEL	FGF5	upstream_gene_variant	T/A	0.3042	1.04	(1.03-1.06)	1.12e-11	83644/1443180
rs10886430	10:121010256	AIS	AS	CROSS-ANC	EUR (AS, AIS)	NOVEL	GRK5	intron_variant	G/A	0.1227	1.08	(1.05-1.10)	2.048e-11	58808/1234420
rs2501966	6:49457835	AIS	AS	CROSS-ANC	EUR (AS)	NOVEL	CENPQ	intron_variant	A/G	0.5358	1.04	(1.03-1.05)	6.188e-11	84440/1453250
rs680084	1:170628255	CES		CROSS-ANC	EUR (CES)	NOVEL	PRRX1	upstream_gene_variant	G/A	0.4661	1.10	(1.07-1.13)	8.049e-11	12026/687803
rs4444878	4:187213883	CES	AIS	CROSS-ANC	EUR (AIS, CES)	NOVEL	F11	downstream_gene_variant	A/C	0.3906	1.10	(1.07-1.13)	1.253e-10	12734/702224
rs2397816	15:96119880	AIS	AS	CROSS-ANC	EUR (AIS	NOVEL	LINC00924	intergenic_variant	A/G	0.4053	1.04	(1.03-1.05)	4.491e-10	72578/1240870
rs11907011	20:33767770	AIS	AS	CROSS-ANC	EUR (AS, AIS)	NOVEL	PROCR	intron_variant	C/T	0.8983	1.06	(1.04-1.09)	9.856e-10	83097/1449630
rs12579302	12:90050503	AS		CROSS-ANC		NOVEL	ATP2B1	intron_variant	A/G	0.753	1.04	(1.03-1.05)	1.338e-09	105648/1567460
rs7974266	12:113007602	AIS	AS	CROSS-ANC	EUR (AIS)	NOVEL	PTPN11	upstream_gene_variant	T/C	0.5953	1.04	(1.03-1.06)	1.427e-09	77984/1432140
rs12426667	12:54433483	AIS	AS	CROSS-ANC		NOVEL	HOXC4	intron_variant	A/C	0.6466	1.04	(1.03-1.05)	1.876e-09	81150/1446210
rs4681330	3:146378341	AS		CROSS-ANC		NOVEL	PLSCR5	intergenic_variant	C/T	0.3641	1.03	(1.02-1.04)	2.797e-09	107104/1573940
rs2108911	17:56570500	AIS	AS	CROSS-ANC	EUR (AS, AIS)	NOVEL	MTMR4	intron_variant	C/T	0.1962	1.05	(1.04-1.07)	4.003e-09	58137/1228030
rs7973143	12:52263869	AS		CROSS-ANC		NOVEL	ANKRD33	intergenic_variant	T/A	0.5995	1.03	(1.02-1.05)	5.833e-09	99044/1529760
rs2738158	8:6749669	CES		CROSS-ANC		NOVEL	DEFB1	intergenic_variant	G/A	0.21	1.14	(1.09-1.19)	6.616e-09	11979/687587
rs415895	11:9769562	AIS		CROSS-ANC		NOVEL	SWAP70	missense_variant	G/C	0.5757	1.04	(1.02-1.05)	6.972e-09	75124/1416400
rs7800053	7:27316640	AS		CROSS-ANC		NOVEL	EVX1	intergenic_variant	G/A	0.1044	1.05	(1.03-1.07)	9.621e-09	108277/1573390
rs2877984	1:183090497	AS		CROSS-ANC		NOVEL	LAMC1	intron_variant	G/A	0.567	1.03	(1.02-1.04)	1.03e-08	108921/1578780
rs2455132	1:3221083	SVS	AS, AIS	CROSS-ANC	EUR (AS)	NOVEL	PRDM16	intron_variant	C/T	0.73	1.10	(1.06-1.13)	1.175e-08	12370/622810
rs2316757	17:45066225	AS		CROSS-ANC		NOVEL	RPRML	intron_variant	A/G	0.4059	1.03	(1.02-1.05)	1.542e-08	102718/1557350
rs4298492	8:26024889	AS		CROSS-ANC		NOVEL	EBF2	intergenic_variant	A/G	0.7561	1.04	(1.02-1.05)	1.741e-08	105914/1568420
rs6722806	2:43627715	AS		CROSS-ANC		NOVEL	THADA	intron_variant	A/T	0.6642	1.04	(1.02-1.05)	1.956e-08	104295/1559730
rs1973765	11:1898664	AIS	AS	CROSS-ANC		NOVEL	LSP1	intron_variant	C/T	0.4821	1.04	(1.02-1.05)	1.998e-08	80376/1437440
rs56393506	6:161089307	LAS		CROSS-ANC		NOVEL	LPA	upstream_gene_variant	T/C	0.1562	1.16	(1.10-1.22)	2.078e-08	8352/572427
rs2663905	15:81359137	AS		CROSS-ANC		NOVEL	MESDC1	intron_variant	G/A	0.3787	1.03	(1.02-1.05)	2.33e-08	94565/1533650
rs11691032	2:164788513	AS		CROSS-ANC		NOVEL	FIGN	intron_variant	C/G	0.2975	1.03	(1.02-1.05)	2.489e-08	107180/1569880
rs114798023	7:108198301	INC_AIS		CROSS-ANC		NOVEL	THAP5	intron_variant	G/A	0.02	1.29	(1.18-1.41)	3.239e-08	15838/567774
rs73852583	3:81070417	AIS		AFR		NOVEL	3p12	intron_variant	A/G	0.0968	1.44	(1.26-1.63)	3.352e-08	1270/12765
rs113916171	7:51190564	AIS	AS	SAS		NOVEL	COBL	intron_variant	A/G	0.0354	1.87	(1.50-2.34)	3.524e-08	2385/7578
rs60401382	10:124227624	SVS	AS, AIS	CROSS-ANC	EUR (AS, AIS)	NOVEL	HTRA1	intron_variant	C/T	0.64	1.08	(1.05-1.12)	3.682e-08	13126/649734
rs2405068	9:98386311	SVS		AFR		NOVEL	PTCH1	intergenic_variant	A/G	0.3164	1.54	(1.32-1.80)	4.592e-08	423/3037
rs1487504	9:17000855	AIS		EUR	EUR (AIS)	NOVEL	BNC2	intergenic_variant	A/G	0.1115	1.06	(1.04-1.09)	4.66e-08	59450/1226120
rs36229526	6:32820656	AIS		EUR	EUR (AIS)	NOVEL	TAP1	intron_variant	T/G	0.0821	1.08	(1.05-1.11)	4.772e-08	57211/1211490
rs12539561	7:106437611	AIS	AS	CROSS-ANC	EUR (AS)	NOVEL	PIK3CG	downstream_gene_variant	C/T	0.1675	1.04	(1.03-1.06)	4.938e-08	84951/1458020
rs2351524	2:203880992	AIS	AS	CROSS-ANC	EUR (AS, AIS)	OLD_LAC_STROKE‡	NBEAL1	5_prime_UTR_variant	C/T	0.8768	1.07	(1.05-1.09)	3.778e-10	61314/1235920
rs9515201	13:111040798	SVS	AS, AIS, INC_AS	CROSS-ANC	EAS (AS, AIS), EUR (AS)	OLD_MEGASTROKE+UKBB‡	COL4A2	intron_variant	A/C	0.25	1.11	(1.07-1.15)	2.119e-08	12248/632950
rs1549758	7:150695726	AIS	AS	CROSS-ANC	EUR (AS, AIS)	OLD_MEGASTROKE+UKBB‡	NOS3	synonymous_variant	T/C	0.269	1.04	(1.03-1.06)	1.953e-08	75902/1423520
rs649129	9:136154304	AIS		CROSS-ANC	EUR (AS, AIS, CES, LAS)	OLD_MEGASTROKE‡	ABO	upstream_gene_variant	T/C	0.2217	1.06	(1.04-1.08)	7.516e-10	50125/644779
rs880315	1:10796866	AIS	AS	CROSS-ANC	EUR (AS, AIS)	OLD_MEGASTROKE‡	CASZ1	intron_variant	C/T	0.454	1.05	(1.03-1.06)	1.908e-13	78178/1426040
rs42035	7:92239531	AIS	AS, INC_AS	CROSS-ANC	EUR (AS, AIS)	OLD_MEGASTROKE‡	CDK6	3_prime_UTR_variant	A/G	0.7605	1.06	(1.04-1.07)	3.333e-12	64739/1268420
rs7859362	9:22105927	AIS	AS	CROSS-ANC	EUR (AS, AIS)	OLD_MEGASTROKE‡	CDKN2B-AS1	intron_variant	C/T	0.5351	1.04	(1.03-1.05)	3.631e-11	85792/1454060
rs6536024	4:155543369	CES	AS, AIS	CROSS-ANC	EUR (AS, AIS, CES)	OLD_MEGASTROKE‡	FGA	upstream_gene_variant	C/T	0.5381	1.09	(1.06-1.12)	3.209e-08	12057/692405
rs79318212	6:1365244	AIS	AS	CROSS-ANC	EUR (AS, AIS)	OLD_MEGASTROKE‡	FOXF2	intergenic_variant	G/A	0.1142	1.09	(1.07-1.11)	3.58e-14	59774/1243540
rs1573644	15:91421283	AIS	AS	CROSS-ANC	EUR (AIS)	OLD_MEGASTROKE‡	FURIN	intron_variant	C/T	0.3103	1.04	(1.03-1.06)	3.557e-09	76382/1426280
rs2107595	7:19049388	LAS	AS, AIS	CROSS-ANC	EUR (LAS)	OLD_MEGASTROKE‡	HDAC9	intergenic_variant	A/G	0.2324	1.16	(1.12-1.21)	5.312e-13	8820/585425
rs28860769	19:10737581	AIS	AS	CROSS-ANC		OLD_MEGASTROKE‡	ILF3	intron_variant	G/A	0.7908	1.05	(1.03-1.07)	1.63e-10	75375/1247220
rs11694327	2:26919429	AIS	AS	CROSS-ANC	EAS (AS)	OLD_MEGASTROKE‡	KCNK3	intron_variant	C/T	0.3858	1.04	(1.03-1.05)	3.458e-08	76591/1422480
rs8106503	19:11196886	AIS		EUR	EUR (AS, AIS)	OLD_MEGASTROKE‡	LDLR	upstream_gene_variant	T/C	0.8895	1.07	(1.04-1.09)	7.85e-09	62139/1241880
rs17148926	5:121510586	AIS	AS	CROSS-ANC	EUR (AS, AIS)	OLD_MEGASTROKE‡	LOC100505841	intron_variant	A/C	0.8272	1.07	(1.05-1.08)	2.763e-12	79282/1434840
rs842365	13:47252379	AIS		EUR	EUR (AIS)	OLD_MEGASTROKE‡	LRCH1	intron_variant	A/G	0.7303	1.05	(1.03-1.06)	3.564e-08	59748/1227020
rs72985562	11:102800278	LAS	AS, AIS	CROSS-ANC	EUR (AS, AIS, LAS)	OLD_MEGASTROKE‡	MMP12	intergenic_variant	G/T	0.0782	1.23	(1.14-1.33)	4.385e-08	6483/372793
rs7304841	12:20577593	AIS	AS	CROSS-ANC	EUR (AIS)	OLD_MEGASTROKE‡	PDE3A	intron_variant	A/C	0.6009	1.05	(1.03-1.06)	4.636e-14	85237/1452640
rs6847935	4:111696651	CES	AS, AIS	CROSS-ANC	EAS (CES), EUR (AS, AIS, CES)	OLD_MEGASTROKE‡	PITX2	intergenic_variant	T/A	0.2613	1.32	(1.28-1.37)	9.448e-59	12032/693130
rs2251636	1:156202809	SVS	AS, AIS	CROSS-ANC	EUR (AS, AIS)	OLD_MEGASTROKE‡	PMF1	intron_variant	G/C	0.62	1.09	(1.06-1.12)	2.885e-10	13090/640012
rs10774625	12:111910219	AIS	AS	CROSS-ANC	EAS (AS, AIS), EUR (AS, AIS)	OLD_MEGASTROKE‡	SH2B3	intron_variant	A/G	0.4744	1.07	(1.05-1.08)	2.646e-20	63742/1252210
rs55983834	10:105601210	AIS	AS, CES, SVS	CROSS-ANC	EAS (AS, AIS), EUR (AS, CES)	OLD_MEGASTROKE‡	SH3PXD2A	intron_variant	C/T	0.5497	1.05	(1.04-1.07)	1.6e-14	70446/1078110
rs1574430	6:43269029	AS		CROSS-ANC		OLD_MEGASTROKE‡	SLC22A7	intron_variant	A/C	0.3936	1.03	(1.02-1.04)	8.56e-10	105759/1565390
rs35429	12:115555867	AIS	AS	CROSS-ANC		OLD_MEGASTROKE‡	12q24	intergenic_variant	A/G	0.6357	1.04	(1.02-1.05)	1.868e-08	84716/1446050
rs3790607	1:113053023	AIS	AS	CROSS-ANC		OLD_MEGASTROKE‡	WNT2B	intron_variant	C/A	0.261	1.05	(1.04-1.07)	8.743e-11	81485/1440000
rs12445022	16:87575332	SVS	AS, AIS	CROSS-ANC	EUR (AS, AIS)	OLD_MEGASTROKE‡	ZCCHC14	intergenic_variant	A/G	0.26	1.11	(1.07-1.15)	1.305e-09	12537/635520
rs2359171	16:73053022	CES	AS, AIS	CROSS-ANC	EUR (CES)	OLD_MEGASTROKE‡	ZFHX3	intron_variant	A/T	0.1944	1.17	(1.13-1.21)	7.52e-18	12601/699746
EA=Effect allele; OA=Other allele; EAF=Effect allele frequency; OR=Odds ratio; 95% CI= 95 percentile confidence interval; N_EVENT=Total number of cases; Total=Total number of participants analysed
AS=Any stroke; AIS=Any ischemic stroke; CES=Cardioembolic stroke; INC_AD=Incident any stroke; SVS=Small vessel stroke; LAS=Large artery stroke; CROSS-ANC=Cross ancestry; EUR=Europeans; EAS=East asians; AFR=Africans; HIS=Hispanics; SAS=South asians
* The locus name was determined by following criteria. (i) if the lead SNP lies within a gene (exonic or intronic), the gene name is taken as the locus name. (ii) for intergenic lead SNPs, where the lead SNP is <= 200kb away from the nearest gene, the nearest gene is taken as the locus name. (iii) for intergenic lead SNPs, where the lead SNP is >200kb away from the nearest gene, the locus name is…
† The ischemic stroke subtypes were prioritised over IS and AS , and IS was prioiritised over AS. If a locus was associated with two or more IS subtypes then that the selected phenotype was IS.
‡ The cross-ancestry association statistics were prioritised unless the variant was significantly associated only in specific ancestry population
§ OLD_MEGASTROKE refers to Malik et al Nat Genet 2018 (PMID: 29531354); OLD_MEGASTROKE+UKBB refers to Malik et al Ann Neurol 2018 (PMID: 30383316) and OLD_LAC_STROKE refers to Traylor et al Lancet Neurol 2021 (PMID: 33773637)

## Sheet: Suppl.Table5
Supplementary Table 5: Significant conditional and joint analysis results in Europeans using GCTA-COJO
Phenotype	Locus	SNP ID	Location (hg19)	EA	OA	EAF	OR (95% CI)	P-value	N	EAF in reference data	OR_Joint (95% CI)	P-value (Joint)*	LD (r)
CES	PITX2	rs2100192	4:111594361	C	A	0.2522	1.11 (1.07 - 1.15)	4.698e-08	10624.5	0.247188	1.12 (1.08 - 1.17)	2.09963e-10	-0.0587703
CES	PITX2	rs6847935	4:111696651	T	A	0.2143	1.31 (1.27 - 1.36)	3.235e-48	11341.2	0.216674	1.33 (1.28 - 1.38)	1.14149e-50	-0.0359209
CES	PITX2	rs11724242	4:111762856	G	A	0.7338	1.1 (1.06 - 1.14)	2.839e-07	10040.1	0.735475	1.11 (1.07 - 1.15)	1.12215e-08	0
CES	SH3PXD2A	rs12415501	10:105324774	T	C	0.155	1.26 (1.18 - 1.34)	3.433e-12	4809.45	0.168439	1.26 (1.18 - 1.34)	4.21009e-12	0.000577955
CES	SH3PXD2A	rs1015037	10:105547517	T	G	0.1174	1.15 (1.1 - 1.21)	7.497e-09	10555.8	0.124904	1.15 (1.1 - 1.21)	8.43287e-09	0
Sorted by genomic location
EA=Effect allele; OA=Other allele; EAF=Effect allele frequency; OR=Odds ratio; 95% CI= 95 percentile confidence interval; N=Effective sample size
*P-value (Joint)<5E-8 suggest genome-wide significant association after conditioning on other lead variants at the locus

## Sheet: Suppl.Table6
Supplementary Table 6: Gene-wide significant associations with stroke (all types and subtypes) in VEGAS2 gene-based tests
Locus	GWAS/VEGAS*	Top SNP ID	Top SNP coordinates	GWAS Phenotype	VEGAS Phenotype	VEGAS Gene	Chromosome (hg19)	Start	Stop	P-value (EUR)†	P-value (EAS)†	P-value (AFR)†	P-value (HIS)†	P-value (SAS)†	P-value (CROSS-ANC)†
PRDM16	GWAS	rs2455132	1:3221083	SVS	AS	PRDM16	1	2985565	3355185	9.99999e-07	0.000116	0.0282097	0.393606	0.00499995	1.35502e-09
PRDM16	GWAS	rs2455132	1:3221083	SVS	AIS	PRDM16	1	2985565	3355185	1.5e-05	0.000121	0.519481	0.245754	0.00446996	9.53077e-08
WNT2B	GWAS	rs3790607	1:113053023	AIS	AS	WNT2B	1	113010040	113063910	3.7e-05	6.19999e-05	0.375624	0.332667	0.324675	1.8325e-07
PMF1	GWAS	rs2251636	1:156202809	SVS	AS	SEMA4A	1	156117145	156147542	5e-06	0.0148999	0.652348	0.723277	0.172827	4.88268e-07
PMF1	GWAS	rs2251636	1:156202809	SVS	AIS	SEMA4A	1	156117145	156147542	2.1e-05	0.00521995	0.777223	0.0795892	0.144855	1.12059e-06
PMF1	GWAS	rs2251636	1:156202809	SVS	AIS	SLC25A44	1	156163728	156182587	9.99999e-07	0.0102199	0.606394	0.801199	0.320679	8.8965e-08
PMF1	GWAS	rs2251636	1:156202809	SVS	AS	SLC25A44	1	156163728	156182587	9.99999e-07	0.0153998	0.44955	0.554446	0.295704	8.78863e-08
PMF1	GWAS	rs2251636	1:156202809	SVS	AS	PMF1	1	156182779	156209868	9.99999e-07	0.000273	0.280719	0.711289	0.0105999	3.91476e-09
PMF1	GWAS	rs2251636	1:156202809	SVS	AS	PMF1-BGLAP	1	156182779	156213123	9.99999e-07	0.000284	0.285714	0.75025	0.00758992	3.93909e-09
PMF1	GWAS	rs2251636	1:156202809	SVS	AIS	PMF1	1	156182779	156209868	9.99999e-07	0.000318	0.28971	0.683317	0.0099999	7.60698e-09
PMF1	GWAS	rs2251636	1:156202809	SVS	AIS	PMF1-BGLAP	1	156182779	156213123	9.99999e-07	0.000348	0.297702	0.67033	0.00781992	7.69758e-09
PMF1	GWAS	rs2251636	1:156202809	SVS	SVS	PMF1-BGLAP	1	156182779	156213123	0.000259	8.69999e-05	0.373626	0.795205	0.678322	2.82805e-07
PMF1	GWAS	rs2251636	1:156202809	SVS	SVS	PMF1	1	156182779	156209868	0.000279	6.69999e-05	0.396603	0.766234	0.854146	3.14518e-07
PMF1	GWAS	rs2251636	1:156202809	SVS	AS	BGLAP	1	156211951	156213123	9.99999e-07	0.000281	0.273726	0.74026	0.00778992	3.86882e-09
PMF1	GWAS	rs2251636	1:156202809	SVS	AIS	BGLAP	1	156211951	156213123	9.99999e-07	0.000304	0.292707	0.682318	0.00803992	7.26844e-09
PMF1	GWAS	rs2251636	1:156202809	SVS	SVS	BGLAP	1	156211951	156213123	0.000267	6.79999e-05	0.392607	0.788212	0.685315	2.45339e-07
PMF1	GWAS	rs2251636	1:156202809	SVS	AS	PAQR6	1	156213112	156217908	2e-06	0.000472	0.188811	0.851149	0.00691993	1.06701e-08
PMF1	GWAS	rs2251636	1:156202809	SVS	AIS	PAQR6	1	156213112	156217908	3e-06	0.000498	0.515485	0.624376	0.00740993	3.20903e-08
KCNK3	GWAS	rs11694327	2:26919429	AIS	AS	KCNK3	2	26915581	26954066	0.001123	9.99999e-07	0.238761	0.156843	0.364635	2.29678e-06
KCNK3	GWAS	rs11694327	2:26919429	AIS	AIS	KCNK3	2	26915581	26954066	0.00273997	2e-06	0.143856	0.836164	0.395604	3.02403e-05
USP34	VEGAS	rs1017584	2:61567906	NA	AS	USP34	2	61414590	61697868	5.99999e-06	0.0182298	0.611389	0.486513	0.95005	1.12633e-06
NBEAL1	GWAS	rs2351524	2:203880992	AIS	AS	ICA1L	2	203637873	203736708	9.99999e-07	0.153846	0.965035	0.966034	0.983017	2.44176e-06
NBEAL1	GWAS	rs2351524	2:203880992	AIS	AIS	ICA1L	2	203637873	203736708	9.99999e-07	0.356643	0.706294	0.986014	0.977023	3.54229e-06
NBEAL1	GWAS	rs2351524	2:203880992	AIS	AIS	WDR12	2	203745323	203776949	9.99999e-07	0.0592794	0.661339	0.966034	0.97003	6.02467e-07
NBEAL1	GWAS	rs2351524	2:203880992	AIS	AS	WDR12	2	203745323	203776949	9.99999e-07	0.108891	0.922078	0.889111	0.987013	1.49885e-06
NBEAL1	GWAS	rs2351524	2:203880992	AIS	SVS	WDR12	2	203745323	203776949	2e-06	0.494505	0.273726	0.513487	0.792208	0.000190288
NBEAL1	GWAS	rs2351524	2:203880992	AIS	AS	CARF	2	203776978	203851060	9.99999e-07	0.215784	0.929071	0.958042	0.979021	3.20523e-06
NBEAL1	GWAS	rs2351524	2:203880992	AIS	AIS	CARF	2	203776978	203851060	9.99999e-07	0.404595	0.691309	0.997003	0.977023	4.39688e-06
NBEAL1	GWAS	rs2351524	2:203880992	AIS	AS	NBEAL1	2	203879597	204091101	9.99999e-07	0.237762	0.959041	0.956044	0.88012	3.19833e-06
NBEAL1	GWAS	rs2351524	2:203880992	AIS	AIS	NBEAL1	2	203879597	204091101	9.99999e-07	0.45954	0.85015	0.981019	0.88012	4.24514e-06
FGF5	GWAS	rs16998073	4:81184341	AIS	AS	FGF5	4	81187742	81212171	0.0474195	9.99999e-07	0.0382896	0.363636	0.168831	0.000390983
PITX2	GWAS	rs6847935	4:111696651	CES	CES	PITX2	4	111538579	111563279	9.99999e-07	0.0453895	0.191808	0.207792	0.128871	3.17085e-07
USP38	VEGAS	rs6818149	4:144125085	NA	AS	USP38	4	144106070	144143141	2e-06	0.488511	0.295704	0.78022	0.236763	6.30369e-06
FGG	GWAS	rs6536024	4:155543369	CES	AIS	PLRG1	4	155456149	155471585	9.99999e-07	0.00949991	0.626374	0.226773	0.961039	1.38353e-07
FGG	GWAS	rs6536024	4:155543369	CES	AS	PLRG1	4	155456149	155471585	9.99999e-07	0.286713	0.0431296	0.979021	0.971029	2.08844e-06
FGG	GWAS	rs6536024	4:155543369	CES	AIS	FGB	4	155484132	155493915	9.99999e-07	5.29999e-05	0.45954	0.192807	0.983017	1.23461e-08
FGG	GWAS	rs6536024	4:155543369	CES	AS	FGB	4	155484132	155493915	9.99999e-07	0.00802992	0.546454	0.775225	0.977023	1.18411e-07
FGG	GWAS	rs6536024	4:155543369	CES	AIS	FGA	4	155504280	155511897	9.99999e-07	4.8e-05	0.75025	0.0183898	0.901099	8.5901e-09
FGG	GWAS	rs6536024	4:155543369	CES	AS	FGA	4	155504280	155511897	9.99999e-07	0.00702993	0.217782	0.208791	0.891109	5.88313e-08
FGG	GWAS	rs6536024	4:155543369	CES	CES	FGA	4	155504280	155511897	3e-06	0.267732	0.0149599	0.792208	0.445554	1.87184e-06
FGG	GWAS	rs6536024	4:155543369	CES	AIS	FGG	4	155525286	155533902	9.99999e-07	0.000202	0.884116	0.0388296	0.723277	1.38007e-08
FGG	GWAS	rs6536024	4:155543369	CES	AS	FGG	4	155525286	155533902	9.99999e-07	0.0167598	0.195804	0.172827	0.748252	9.19434e-08
FGG	GWAS	rs6536024	4:155543369	CES	CES	FGG	4	155525286	155533902	9.99999e-07	0.211788	0.301698	0.685315	0.415584	7.38801e-07
F11	GWAS	rs4444878	4:187213883	CES	AIS	KLKB1	4	187148502	187179625	2e-06	0.536464	0.744256	0.0376596	0.281718	4.73827e-06
F11	GWAS	rs4444878	4:187213883	CES	CES	F11	4	187187099	187210835	9.99999e-07	0.0658793	0.597403	0.436563	0.346653	5.62536e-07
F11	GWAS	rs4444878	4:187213883	CES	AIS	F11	4	187187099	187210835	9.99999e-07	0.16983	0.796204	0.0778492	0.242757	5.63776e-07
LOC100505841	GWAS	rs17148926	5:121510586	AIS	AIS	LOC100505841	5	121495871	121518358	9.99999e-07	0.00250997	0.105894	0.595405	0.187812	3.01599e-08
LOC100505841	GWAS	rs17148926	5:121510586	AIS	AS	LOC100505841	5	121495871	121518358	9.99999e-07	0.0124799	0.263736	0.789211	0.175824	6.32389e-08
FOXF2	GWAS	rs79318212	6:1365244	AIS	AIS	FOXQ1	6	1312675	1314993	9.99999e-07	0.5005	0.0359096	0.536464	0.421578	2.43397e-06
FOXF2	GWAS	rs79318212	6:1365244	AIS	AS	FOXQ1	6	1312675	1314993	9.99999e-07	0.989011	0.694306	0.480519	0.412587	0.000141366
SLC22A7	GWAS	rs1574430	6:43269029	AS	AS	SLC22A7	6	43265737	43273276	3.1e-05	0.000184	0.0454695	0.258741	0.501499	1.84859e-07
SLC22A7	GWAS	rs1574430	6:43269029	AS	AS	CRIP3	6	43273211	43277005	3.5e-05	0.000355	0.233766	0.322677	0.701299	4.38922e-07
SLC22A7	GWAS	rs1574430	6:43269029	AS	AS	ZNF318	6	43303808	43337181	2e-05	0.000274	0.238761	0.134865	0.802198	2.08496e-07
CENPQ	GWAS	rs2501966	6:49457835	AIS	AS	MUT	6	49398073	49431041	2e-06	0.000591999	0.200799	0.422577	0.988012	3.68272e-08
CENPQ	GWAS	rs2501966	6:49457835	AIS	AS	CENPQ	6	49431054	49460820	9.99999e-07	0.000191	0.272727	0.431568	0.387612	5.10498e-09
CENPQ	GWAS	rs2501966	6:49457835	AIS	AIS	CENPQ	6	49431054	49460820	9.99999e-06	0.000907999	0.46953	0.0453095	0.384615	2.44546e-07
CENPQ	GWAS	rs2501966	6:49457835	AIS	AS	GLYATL3	6	49467671	49495777	7.69999e-05	0.000184	0.412587	0.432567	0.13986	6.44277e-07
CENPQ	GWAS	rs2501966	6:49457835	AIS	AIS	GLYATL3	6	49467671	49495777	0.000109	0.000657999	0.340659	0.0352896	0.133866	2.48398e-06
HDAC9	GWAS	rs2107595	7:19049388	LAS	LAS	TWIST1	7	19039315	19157295	9.99999e-07	0.0344097	0.648352	0.833167	0.148851	1.73285e-07
CDK6	GWAS	rs42035	7:92239531	AIS	AS	CDK6	7	92234235	92465941	9.99999e-07	0.0353896	0.426573	0.433566	0.163836	1.44949e-07
CDK6	GWAS	rs42035	7:92239531	AIS	AIS	CDK6	7	92234235	92465941	9.99999e-07	0.869131	0.284715	0.0502295	0.146853	8.45017e-06
ABO	GWAS	rs649129	9:136154304	AIS	AIS	ABO	9	136130563	136150630	9.99999e-07	0.0594194	0.596404	0.689311	1	1
ABO	GWAS	rs649129	9:136154304	AIS	AS	ABO	9	136130563	136150630	9.99999e-07	0.255744	0.0405896	0.438561	1	1
ABO	GWAS	rs649129	9:136154304	AIS	CES	ABO	9	136130563	136150630	9.99999e-07	0.424575	0.711289	0.260739	0.89011	1.54047e-06
ABO	GWAS	rs649129	9:136154304	AIS	LAS	ABO	9	136130563	136150630	2e-06	0.882118	0.0397496	0.351648	0.68032	1.63275e-05
AGAP5	VEGAS	rs11000728	10:75404300	NA	CES	SYNPO2L	10	75404639	75415832	9.99999e-07	0.380619	0.665335	0.781219	0.285714	1.02101e-06
AGAP5	VEGAS	rs76192127	10:75462510	NA	CES	AGAP5	10	75434033	75464357	9.99999e-07	0.490509	0.174825	0.633367	0.241758	8.19201e-07
AGAP5	VEGAS	rs11000766	10:75512952	NA	CES	SEC24C	10	75504039	75531933	9.99999e-07	0.916084	0.517483	0.922078	0.844156	3.08102e-06
AGAP5	VEGAS	rs11000772	10:75543406	NA	CES	CHCHD1	10	75541808	75543406	2e-06	0.932068	0.655345	0.866134	0.905095	6.91884e-06
SH3PXD2A	GWAS	rs55983834	10:105601210	AIS	CES	NEURL1	10	105253735	105352309	9.99999e-07	0.000118	0.185814	0.295704	0.656344	2.0886e-07
SH3PXD2A	GWAS	rs55983834	10:105601210	AIS	CES	SH3PXD2A	10	105353784	105615195	9.99999e-07	0.0826492	0.165834	0.857143	0.128871	4.33131e-07
SH3PXD2A	GWAS	rs55983834	10:105601210	AIS	AS	SH3PXD2A	10	105353784	105615195	1.4e-05	9.99999e-07	0.115884	0.0812192	0.197802	6.04923e-09
SH3PXD2A	GWAS	rs55983834	10:105601210	AIS	AIS	SH3PXD2A	10	105353784	105615195	0.000479	2e-06	0.457542	0.0779992	0.192807	2.38504e-06
SH3PXD2A	GWAS	rs55983834	10:105601210	AIS	SVS	SH3PXD2A	10	105353784	105615195	0.00202998	6.79999e-05	0.342657	0.605395	0.837163	2.54214e-06
SH3PXD2A	GWAS	rs55983834	10:105601210	AIS	AS	OBFC1	10	105637316	105678045	9.99999e-07	9.99999e-07	0.108891	0.264735	0.904096	4.87721e-10
SH3PXD2A	GWAS	rs55983834	10:105601210	AIS	AIS	OBFC1	10	105637316	105678045	0.000118	9.99999e-07	0.739261	0.424575	0.937063	7.41858e-07
SH3PXD2A	GWAS	rs55983834	10:105601210	AIS	SVS	OBFC1	10	105637316	105678045	0.00341997	3e-06	0.582418	0.664336	0.0743993	2.82995e-07
HTRA1	GWAS	rs60401382	10:124227624	SVS	AIS	ARMS2	10	124214179	124216868	9.99999e-07	0.00295997	0.486513	0.863137	0.33966	4.52418e-08
HTRA1	GWAS	rs60401382	10:124227624	SVS	AS	ARMS2	10	124214179	124216868	2e-06	0.00475995	0.669331	0.702298	0.320679	9.92819e-08
HTRA1	GWAS	rs60401382	10:124227624	SVS	AIS	HTRA1	10	124221041	124274424	9.99999e-07	0.00115999	0.341658	0.59041	0.3996	2.61706e-08
HTRA1	GWAS	rs60401382	10:124227624	SVS	AS	HTRA1	10	124221041	124274424	5e-06	0.00192998	0.346653	0.234765	0.382617	1.09487e-07
MMP12	GWAS	rs72985562	11:102800278	LAS	LAS	MMP3	11	102706528	102714342	9.99999e-07	0.537463	0.618382	0.595405	0.247752	2.29362e-06
MMP12	GWAS	rs72985562	11:102800278	LAS	AIS	MMP3	11	102706528	102714342	2e-06	0.656344	0.214785	0.151848	0.404595	7.58537e-06
MMP12	GWAS	rs72985562	11:102800278	LAS	AS	MMP3	11	102706528	102714342	2e-06	0.702298	0.572428	0.375624	0.447552	1.82797e-05
MMP12	GWAS	rs72985562	11:102800278	LAS	AS	MMP12	11	102733464	102745764	9.99999e-07	0.245754	0.849151	0.308691	0.178821	1.43227e-06
MMP12	GWAS	rs72985562	11:102800278	LAS	AIS	MMP12	11	102733464	102745764	9.99999e-07	0.835165	0.949051	0.216783	0.163836	8.70244e-06
MMP12	GWAS	rs72985562	11:102800278	LAS	LAS	MMP12	11	102733464	102745764	2e-06	0.0858591	0.210789	0.377622	0.168831	4.29396e-07
HOXC4	GWAS	rs12426667	12:54433483	AIS	AS	HOXC4	12	54388716	54449814	5.49999e-05	0.000213	0.156843	0.332667	0.794206	5.75021e-07
HOXC4	GWAS	rs12426667	12:54433483	AIS	AS	HOXC5	12	54410642	54429145	6.49999e-05	0.000114	0.100899	0.164835	0.832168	4.785e-07
ATP2B1	GWAS	rs12579302	12:90050503	AS	AS	ATP2B1	12	89981826	90103130	0.00832992	9.99999e-07	0.433566	0.846154	0.926074	6.84046e-05
SH2B3	GWAS	rs10774625	12:111910219	AIS	AIS	CCDC63	12	111284757	111345339	0.0130799	9.99999e-07	0.833167	0.133866	0.998002	0.0003802
SH2B3	GWAS	rs10774625	12:111910219	AIS	AIS	MYL2	12	111348623	111358404	0.0002	9.99999e-07	0.272727	0.121878	0.981019	1.37566e-06
SH2B3	GWAS	rs10774625	12:111910219	AIS	SVS	MYL2	12	111348623	111358404	0.14985	2e-06	0.348651	0.231768	0.869131	0.000128452
SH2B3	GWAS	rs10774625	12:111910219	AIS	AIS	CUX2	12	111471828	111788358	5e-06	9.99999e-07	0.562438	0.122877	0.471528	9.04082e-09
SH2B3	GWAS	rs10774625	12:111910219	AIS	AS	CUX2	12	111471828	111788358	3.1e-05	9.99999e-07	0.819181	0.204795	0.436563	3.87927e-08
SH2B3	GWAS	rs10774625	12:111910219	AIS	AIS	FAM109A	12	111798455	111806925	3e-06	0.0103999	0.462537	0.879121	0.821179	4.15848e-07
SH2B3	GWAS	rs10774625	12:111910219	AIS	AIS	SH2B3	12	111843720	111889427	9.99999e-07	0.00571994	0.13986	0.884116	0.0791092	4.51559e-08
SH2B3	GWAS	rs10774625	12:111910219	AIS	AS	SH2B3	12	111843720	111889427	9.99999e-07	0.0126899	0.827173	0.9001	0.0793392	9.35147e-08
SH2B3	GWAS	rs10774625	12:111910219	AIS	AIS	ATXN2	12	111890018	112037480	9.99999e-07	0.00333997	0.0864891	0.606394	0.0837392	3.0152e-08
SH2B3	GWAS	rs10774625	12:111910219	AIS	AS	ATXN2	12	111890018	112037480	9.99999e-07	0.00835992	0.617383	0.788212	0.0801792	5.50078e-08
SH2B3	GWAS	rs10774625	12:111910219	AIS	AIS	BRAP	12	112079950	112123790	9.99999e-07	1.2e-05	0.152847	0.644356	0.968032	6.67252e-09
SH2B3	GWAS	rs10774625	12:111910219	AIS	AS	BRAP	12	112079950	112123790	9.99999e-07	0.00012	0.723277	0.847153	0.975025	1.20634e-08
SH2B3	GWAS	rs10774625	12:111910219	AIS	AIS	ACAD10	12	112123857	112194911	9.99999e-07	2.5e-05	0.123876	0.782218	0.00670993	2.35854e-09
SH2B3	GWAS	rs10774625	12:111910219	AIS	AS	ACAD10	12	112123857	112194911	9.99999e-07	0.000466	0.869131	0.896104	0.00702993	9.27393e-09
SH2B3	GWAS	rs10774625	12:111910219	AIS	AIS	ALDH2	12	112204691	112247789	9.99999e-07	9.99999e-07	0.0887991	0.619381	0.997003	3.42706e-09
SH2B3	GWAS	rs10774625	12:111910219	AIS	AS	ALDH2	12	112204691	112247789	9.99999e-07	2.4e-05	0.962038	0.734266	0.992008	8.46193e-09
SH2B3	GWAS	rs10774625	12:111910219	AIS	AIS	MAPKAPK5	12	112280032	112331228	2e-06	3.1e-05	0.0247698	0.466533	0.84016	1.43868e-08
SH2B3	GWAS	rs10774625	12:111910219	AIS	AS	MAPKAPK5	12	112280032	112331228	3e-06	0.000223	0.799201	0.4995	0.852148	4.15807e-08
SH2B3	GWAS	rs10774625	12:111910219	AIS	AS	MAPKAPK5	12	112280032	112331228	3e-06	0.000255	0.799201	0.4995	0.852148	4.45456e-08
SH2B3	GWAS	rs10774625	12:111910219	AIS	AIS	TMEM116	12	112369086	112451023	5e-06	0.000187	0.0443396	0.152847	0.00538995	2.74575e-08
SH2B3	GWAS	rs10774625	12:111910219	AIS	AS	TMEM116	12	112369086	112451023	2.2e-05	0.000604999	0.632368	0.120879	0.00494995	2.0037e-07
SH2B3	GWAS	rs10774625	12:111910219	AIS	AS	TMEM116	12	112369086	112451023	2.2e-05	0.000618999	0.632368	0.120879	0.00494995	2.02777e-07
SH2B3	GWAS	rs10774625	12:111910219	AIS	AIS	ERP29	12	112451152	112461024	9.99999e-07	9.99999e-07	0.0339397	0.114885	0.490509	1.14471e-09
SH2B3	GWAS	rs10774625	12:111910219	AIS	AS	ERP29	12	112451152	112461024	2.3e-05	8.99999e-06	0.946054	0.114885	0.495504	8.02247e-08
SH2B3	GWAS	rs10774625	12:111910219	AIS	AIS	NAA25	12	112464493	112546826	9.99999e-07	9.99999e-07	0.0296897	0.207792	0.0156398	5.89975e-10
SH2B3	GWAS	rs10774625	12:111910219	AIS	AS	NAA25	12	112464493	112546826	9.99999e-07	2e-05	0.801199	0.228771	0.0155798	1.41191e-09
SH2B3	GWAS	rs10774625	12:111910219	AIS	AIS	TRAFD1	12	112563349	112591408	4e-06	2e-06	0.0317997	0.115884	0.596404	8.2498e-09
SH2B3	GWAS	rs10774625	12:111910219	AIS	AS	TRAFD1	12	112563349	112591408	2.8e-05	7.89999e-05	0.678322	0.11988	0.572428	1.98568e-07
SH2B3	GWAS	rs10774625	12:111910219	AIS	AS	HECTD4	12	112597992	112820113	9.99999e-07	0.000129	0.656344	0.116883	0.0187198	3.08085e-09
SH2B3	GWAS	rs10774625	12:111910219	AIS	AIS	HECTD4	12	112597992	112820113	2e-06	1.2e-05	0.0302797	0.0939591	0.0191298	3.3724e-09
SH2B3	GWAS	rs10774625	12:111910219	AIS	AIS	RPL6	12	112842994	112856647	9.99999e-07	9.99999e-07	0.0258697	0.122877	0.0108999	5.38624e-10
SH2B3	GWAS	rs10774625	12:111910219	AIS	AS	RPL6	12	112842994	112856647	2e-06	9.99999e-07	0.636364	0.187812	0.0114199	6.47805e-10
SH2B3	GWAS	rs10774625	12:111910219	AIS	AIS	PTPN11	12	112856536	112947717	9.99999e-07	9.99999e-07	0.0326897	0.297702	0.235764	9.80872e-10
SH2B3	GWAS	rs10774625	12:111910219	AIS	AS	PTPN11	12	112856536	112947717	2e-06	3e-06	0.747253	0.300699	0.223776	1.87066e-09
LRCH1	GWAS	rs842365	13:47252379	EUR_AIS	AIS	LRCH1	13	47127296	47327176	2e-06	0.0753992	0.384615	0.44955	0.971029	1.13764e-06
COL4A2	GWAS	rs9515201	13:111040798	SVS	AS	COL4A1	13	110801310	110959496	9.99999e-07	0.000223	0.128871	0.291708	0.811189	6.20744e-09
COL4A2	GWAS	rs9515201	13:111040798	SVS	AIS	COL4A1	13	110801310	110959496	4.2e-05	0.000194	0.536464	0.476523	0.807193	1.04078e-06
FURIN	GWAS	rs1573644	15:91421283	AIS	AS	FURIN	15	91411885	91426687	2e-06	0.376623	0.0136099	0.605395	0.83017	3.62067e-06
FURIN	GWAS	rs1573644	15:91421283	AIS	AIS	FURIN	15	91411885	91426687	2e-06	0.659341	0.536464	0.669331	0.828172	1.2115e-05
ZFHX3	GWAS	rs2359171	16:73053022	CES	CES	ZFHX3	16	72816784	73092534	9.99999e-07	0.00658993	0.207792	0.355644	0.13986	2.40763e-07
ZFHX3	GWAS	rs2359171	16:73053022	CES	AS	ZFHX3	16	72816784	73092534	6.99999e-06	0.0440796	0.302697	0.192807	0.708292	1.49119e-06
MTMR4	GWAS	rs2108911	17:56570500	AIS	AIS	MPO	17	56347217	56358296	9.99999e-07	0.376623	0.246753	0.67033	0.791209	2.24401e-06
MTMR4	GWAS	rs2108911	17:56570500	AIS	AS	RNF43	17	56431037	56494931	9.99999e-07	0.447552	0.981019	0.274725	0.444555	5.46414e-06
MTMR4	GWAS	rs2108911	17:56570500	AIS	AIS	RNF43	17	56431037	56494931	2e-06	0.312687	0.355644	0.362637	0.420579	2.4793e-06
MTMR4	GWAS	rs2108911	17:56570500	AIS	AIS	HSF5	17	56497528	56565759	9.99999e-07	0.211788	0.794206	0.326673	0.841159	1.20889e-06
MTMR4	GWAS	rs2108911	17:56570500	AIS	AS	HSF5	17	56497528	56565759	2e-06	0.0179598	0.743257	0.283716	0.818182	3.26402e-07
MTMR4	GWAS	rs2108911	17:56570500	AIS	AIS	MTMR4	17	56566893	56595271	9.99999e-07	0.392607	0.654346	0.301698	0.725275	2.2269e-06
MTMR4	GWAS	rs2108911	17:56570500	AIS	AS	MTMR4	17	56566893	56595271	2e-06	0.0678093	0.462537	0.234765	0.707293	7.06427e-07
MTMR4	GWAS	rs2108911	17:56570500	AIS	AS	SEPT4	17	56597611	56618179	5e-06	0.0389596	0.565435	0.231768	0.66034	1.13102e-06
MTMR4	GWAS	rs2108911	17:56570500	AIS	AIS	C17orf47	17	56618948	56621733	9.99999e-07	0.11988	0.721279	0.305694	0.584416	5.55558e-07
MTMR4	GWAS	rs2108911	17:56570500	AIS	AS	C17orf47	17	56618948	56621733	2e-06	0.0458795	0.507493	0.274725	0.607393	4.9173e-07
ILF3	GWAS	rs28860769	19:10737581	AIS	AIS	SLC44A2	19	10713121	10755235	9.99999e-07	0.00623994	0.0676993	0.45954	0.841159	8.15289e-08
ILF3	GWAS	rs28860769	19:10737581	AIS	AS	SLC44A2	19	10713121	10755235	1.8e-05	0.0096399	0.270729	0.347652	0.817183	1.47718e-06
LDLR	GWAS	rs8106503	19:11196886	EUR_AIS	AIS	SMARCA4	19	11071598	11172958	9.99999e-06	0.00854991	0.274725	0.625375	0.948052	1.4046e-06
LDLR	GWAS	rs8106503	19:11196886	EUR_AIS	AS	SMARCA4	19	11071598	11172958	1.9e-05	0.00678993	0.00830992	0.73027	0.946054	1.02303e-06
LDLR	GWAS	rs8106503	19:11196886	EUR_AIS	AIS	LDLR	19	11200037	11244506	2e-06	0.549451	0.182817	0.512488	0.933067	8.64363e-06
LDLR	GWAS	rs8106503	19:11196886	EUR_AIS	AS	LDLR	19	11200037	11244506	3e-06	0.10989	0.734266	0.607393	0.936064	2.6903e-06
MAMSTR	VEGAS	rs8112983	19:49229525	NA	AIS	MAMSTR	19	49215999	49222976	2e-06	0.148851	0.187812	0.215784	0.407592	1.04206e-06
PROCR	GWAS	rs11907011	20:33767770	AIS	AS	GSS	20	33516236	33543794	9.99999e-07	0.533467	0.305694	0.566434	0.726274	5.17845e-06
PROCR	GWAS	rs11907011	20:33767770	AIS	AIS	GSS	20	33516236	33543794	9.99999e-07	0.797203	0.486513	0.596404	0.725275	1.03105e-05
PROCR	GWAS	rs11907011	20:33767770	AIS	AS	MYH7B	20	33543704	33590240	9.99999e-07	0.460539	0.451548	0.46953	0.220779	3.07729e-06
PROCR	GWAS	rs11907011	20:33767770	AIS	AIS	MYH7B	20	33543704	33590240	9.99999e-07	0.826174	0.741259	0.43956	0.264735	8.9435e-06
PROCR	GWAS	rs11907011	20:33767770	AIS	AS	TRPC4AP	20	33590207	33680618	9.99999e-07	0.394605	0.574426	0.402597	0.363636	2.71914e-06
PROCR	GWAS	rs11907011	20:33767770	AIS	AIS	TRPC4AP	20	33590207	33680618	9.99999e-07	0.794206	0.69031	0.325674	0.378621	7.98803e-06
PROCR	GWAS	rs11907011	20:33767770	AIS	AS	EDEM2	20	33703160	33735161	9.99999e-07	0.221778	0.74026	0.573427	0.471528	1.46557e-06
PROCR	GWAS	rs11907011	20:33767770	AIS	AIS	EDEM2	20	33703160	33735161	9.99999e-07	0.656344	0.782218	0.416583	0.45954	4.98258e-06
PROCR	GWAS	rs11907011	20:33767770	AIS	AS	PROCR	20	33759740	33803771	9.99999e-07	0.195804	0.438561	0.916084	0.26973	1.01155e-06
PROCR	GWAS	rs11907011	20:33767770	AIS	AIS	PROCR	20	33759740	33803771	9.99999e-07	0.35964	0.223776	0.823177	0.293706	1.54468e-06
Sorted by genomic location of a gene (chromosome and start position)
NA=Not applicable; AS=Any stroke; AIS=Any ischemic stroke; CES=Cardioembolic stroke; SVS=Small vessel stroke; LAS=Large artery stroke; CROSS-ANC=Cross ancestry; EUR=Europeans; EAS=East asians; AFR=Africans; HIS=Hispanics; SAS=South asians
* In bold, the VEGAS identified loci are highlighted. These loci did not pass genome-wide significant threshold in single variant inverse variance weighted meta-analysis.
† p-value<2.72E-6 suggest gene-wide significant association, correcting for multiple association tests performed for 18,371 genes; The VEGAS2 ancestry specific p-values are empirical p-values generated using a maximum number of 1,000,000 simulations

## Sheet: Suppl.Table7
Supplementary Table 7: Additional stroke risk loci identified through VEGAS2 gene-based tests (that did not reach genome-wide significance in the GWAS meta-analysis)
Loci not identified in GWAS for any stroke type or subtype
Locus	VEGAS Phenotype	VEGAS Gene	Chromosome (hg19)	Start	Stop	P-value (EUR)†	P-value (EAS)†	P-value (AFR)†	P-value (HIS)†	P-value (SAS)†	P-value (CROSS-ANC)†
USP34	AS	USP34	2	61414590	61697868	5.99999e-06	0.0182298	0.611389	0.486513	0.95005	1.12633e-06
USP38	AS	USP38	4	144106070	144143141	2e-06	0.488511	0.295704	0.78022	0.236763	6.30369e-06
MAMSTR	IS	MAMSTR	19	49215999	49222976	2e-06	0.148851	0.187812	0.215784	0.407592	1.04206e-06
AGAP5	CES	AGAP5	10	75434033	75464357	9.99999e-07	0.490509	0.174825	0.633367	0.241758	8.19201e-07
	CES	SYNPO2L	10	75404639	75415832	9.99999e-07	0.380619	0.665335	0.781219	0.285714	1.02101e-06
	CES	SEC24C	10	75504039	75531933	9.99999e-07	0.916084	0.517483	0.922078	0.844156	3.08102e-06
	CES	CHCHD1	10	75541808	75543406	2e-06	0.932068	0.655345	0.866134	0.905095	6.91884e-06
Loci not identified in GWAS for a given stroke subtype
Stroke subtype	Locus	GWAS/VEGAS*	Top SNP ID	Top SNP coordinates	GWAS Phenotype	VEGAS Phenotype	VEGAS Gene	Chromosome (hg19)	Start	Stop	P-value (EUR)†	P-value (EAS)†	P-value (AFR)†	P-value (HIS)†	P-value (SAS)†	P-value (CROSS-ANC)†
CES	ABO	GWAS	rs649129	9:136154304	IS	CES	ABO	9	136130563	136150630	9.99999e-07	0.424575	0.711289	0.260739	0.89011	1.54047e-06
	SH3PXD2A	GWAS	rs55983834	10:105601210	IS	CES	NEURL1	10	105253735	105352309	9.99999e-07	0.000118	0.185814	0.295704	0.656344	2.0886e-07
						CES	SH3PXD2A	10	105353784	105615195	9.99999e-07	0.0826492	0.165834	0.857143	0.128871	4.33131e-07
LAS	ABO	GWAS	rs649129	9:136154304	IS	LAS	ABO	9	136130563	136150630	2e-06	0.882118	0.0397496	0.351648	0.68032	1.63275e-05
SVS	NBEAL1	GWAS	rs2351524	2:203880992	IS	SVS	WDR12	2	203745323	203776949	2e-06	0.494505	0.273726	0.513487	0.792208	0.000190288
	SH3PXD2A	GWAS	rs55983834	10:105601210	IS	SVS	SH3PXD2A	10	105353784	105615195	0.00202998	6.79999e-05	0.342657	0.605395	0.837163	2.54214e-06
		GWAS				SVS	OBFC1	10	105637316	105678045	0.00341997	3e-06	0.582418	0.664336	0.0743993	2.82995e-07
	SH2B3	GWAS	rs10774625	12:111910219	IS	SVS	MYL2	12	111348623	111358404	0.14985	2e-06	0.348651	0.231768	0.869131	0.000128452
AS=Any stroke; AIS=Any ischemic stroke; CES=Cardioembolic stroke; SVS=Small vessel stroke; LAS=Large artery stroke; CROSS-ANC=Cross ancestry; EUR=Europeans; EAS=East asians; AFR=Africans; HIS=Hispanics; SAS=South asians
*Identified first in single variant GWAS analysis or in gene-based analysis
†p-value<2.72E-6 suggest gene-wide significant association, correcting for multiple association tests performed for 18,371 genes; The VEGAS2 ancestry specific p-values are empirical p-values generated using maximum number of 1,000,000 simulations

## Sheet: Suppl.Table8
Supplementary Table 8: Additional genome-wide significant stroke risk loci identified in the multiancestry GWAS meta-analysis using MR-MEGA
SNP ID	Coordinates	Phenotype	Old_Novel	Gene	Function	EA/OA	EAF	OR	95%CI	P-value (MRMega)*	P-value (FE)	P-value.Het (FE)	P-value.Het-ANC	P-value.Het-RES	N_EVENT/TOTAL
		Main
rs78015967	12:85397831	AS	NOVEL	TSPAN19	intergenic_variant	C/T	0.051566	1.01	(0.98-1.04)	1.9082e-17	0.4222	1.505e-12	4.33681e-18	0.577536	72535/1271250
rs55683442	3:16665458	AS	NOVEL	DAZL	intron_variant	G/A	0.940719	1.01	(0.98-1.04)	5.31068e-10	0.6671	6.971e-05	1.27158e-10	0.917307	72368/1270640
rs7021485	9:114518297	AS	NOVEL	SHOC1	intron_variant	G/C	0.341641	1.03	(1.02-1.04)	4.81409e-08	5.578e-07	0.1051	0.000818522	0.594229	107160/1574430
Sorted by P-value (MRMega)
EA=Effect allele; OA=Other allele; EAF=Effect allele frequency; OR=Odds ratio; 95% CI= 95 percentile confidence interval; N_EVENT=Total number of cases; Total=Total number of participants analysed
AS=Any stroke; FE=Fixed effect; Het=Heterogeniety; Het-ANC=Ancetral heterogeniety; Het-RES=Residual heterogeniety
* The locus was considered to be a genome-wide significant association if the MRMega P-value was less than 5E-8

## Sheet: Suppl.Table9
Supplementary Table 9: Genome-wide significant risk loci for large artery stroke in a multitrait analysis with coronary artery disease
EUR
Locus	SNP ID	Coordinates	EA	OA	EAF	MTAG-LAS OR (95% CI)	MTAG-LAS P-value**	LAS OR (95% CI)	LAS P-value	CAD OR (95% CI)	CAD P-value	GWS associations in univariate GWAS	METAL (IVW) lead variant	LD in EUR (r2)†
IL6R	rs11265613	1:154418415	T	C	0.5977	1.05 (1.03 - 1.07)	1.44184e-08	1.05 (1 - 1.09)	0.04063	1.05 (1.03 - 1.07)	4.96e-08
THADA	rs76866386	2:44075483	T	C	0.9356	1.11 (1.08 - 1.15)	8.67982e-10	1.19 (1.09 - 1.31)	0.0002221	1.12 (1.07 - 1.16)	1.58e-07	AS (CROSS-ANC)	rs6722806	0.000934899
FN1	rs17517928	2:216291359	C	T	0.7443	1.06 (1.04 - 1.08)	2.4988e-08	1.07 (1.02 - 1.12)	0.005955	1.06 (1.04 - 1.08)	5.14e-07
FGD5	rs748431	3:14928077	G	T	0.3792	1.05 (1.04 - 1.07)	2.63717e-09	1.07 (1.03 - 1.12)	0.0009185	1.05 (1.03 - 1.07)	2.14e-07
EDNRA‡	rs1878406	4:148393664	T	C	0.1418	1.08 (1.05 - 1.11)	1.25506e-09	1.16 (1.09 - 1.24)	4.508e-06	1.06 (1.04 - 1.09)	1.24e-06
LPA	rs55730499	6:161005610	T	C	0.0649	1.27 (1.23 - 1.31)	7.35061e-43	1.26 (1.16 - 1.38)	1.572e-07	1.37 (1.31 - 1.44)	5.39e-39	LAS (CROSS-ANC)	rs56393506	0.341649
HDAC9	rs2107595	7:19049388	A	G	0.1684	1.1 (1.08 - 1.12)	4.70974e-17	1.19 (1.13 - 1.26)	1.43e-10	1.08 (1.05 - 1.1)	8.05e-11	LAS (EUR, CROSS-ANC), AS (CROSS-ANC) and AIS (CROSS-ANC)	rs2107595	same variant
ABO	rs532436	9:136149830	A	G	0.194	1.09 (1.07 - 1.11)	3.58254e-15	1.13 (1.07 - 1.19)	3.344e-06	1.08 (1.06 - 1.11)	1.61e-11	LAS (EUR), CES (EUR), AIS (EUR, CROSS-ANC) and AS (EUR)	rs649129	0.828317
JCAD	rs2487928	10:30323892	A	G	0.4513	1.06 (1.04 - 1.08)	7.16579e-12	1.05 (1.01 - 1.1)	0.01278	1.06 (1.04 - 1.08)	4.41e-11
LIPA	rs1412444	10:91002927	T	C	0.3316	1.07 (1.05 - 1.09)	4.39225e-15	1.1 (1.05 - 1.14)	2.426e-05	1.07 (1.05 - 1.09)	5.15e-12
SWAP70	rs10840293	11:9751196	A	G	0.5767	1.05 (1.03 - 1.07)	4.73992e-09	1.05 (1 - 1.09)	0.04916	1.06 (1.04 - 1.08)	1.28e-08	AIS (CROSS-ANC)	rs415895	0.712535
MMP12	rs12792912	11:102801303	T	G	0.5696	1.05 (1.04 - 1.07)	2.23074e-09	1.09 (1.04 - 1.13)	0.0001542	1.05 (1.03 - 1.07)	5.71e-07	LAS (EUR, CROSS-ANC), AIS (EUR, CROSS-ANC) and AS (EUR, CROSS-ANC)	rs72985562	0.0817882
SH2B3	rs10774625	12:111910219	A	G	0.4888	1.06 (1.04 - 1.08)	7.73937e-12	1.07 (1.02 - 1.11)	0.002365	1.07 (1.05 - 1.09)	2.69e-10	AIS (EUR, EAS, CROSS-ANC) and AS (EUR, EAS, CROSS-ANC)	rs10774625	same variant
FLT1	rs1924981	13:29022645	T	C	0.3279	1.05 (1.03 - 1.07)	1.87083e-08	1.07 (1.02 - 1.11)	0.004162	1.05 (1.03 - 1.07)	5.11e-07
FURIN	rs8027450	15:91418394	T	C	0.326	1.06 (1.04 - 1.08)	2.18435e-09	1.09 (1.03 - 1.14)	0.0009598	1.06 (1.04 - 1.08)	1.35e-07	AIS (EUR, CROSS-ANC) and AS (CROSS-ANC)	rs1573644	0.889748
EAS
Locus	rsID	SNP	RA	OA	FRQ_RA	MTAG-LAS_OR (95% CI)	MTAG-LAS_pval	LAS_OR (95% CI)	LAS_pval	CAD_OR (95% CI)	CAD_pval	GWS associations in univariate GWAS	METAL (IVW) lead variant	LD in EAS (r2)
HDAC9	rs2107595	7:19049388	A	G	0.3438	1.11 ( 1.08 - 1.15 )	4.32717e-10	1.12 ( 1.04 - 1.21 )	0.002916	1.06 ( 1.04 - 1.08 )	1.09162e-09	LAS (CROSS-ANC)	rs2107595	same variant
Sorted by genomic location
EA=Effect allele; OA=Other allele; EAF=Effect allele frequency; OR=Odds ratio; 95% CI= 95 percentile confidence interval; CES=Cardioembolic stroke; AF=Arterial fibrilation; IVW=Inverse variance weighted; LD=Linkage disequilibrium
In bold, novel loci for LAS, not GWS in univariate European or cross-ancestry GWAS of LAS
*MTAG-LAS P-value<5E-8 suggest genome-wide significant association. The variant must also have p-value<0.05 in univariate association analyses and the MTAG-LAS p-value must be less than an univariate association p-value.
†Linkage disequilibrium in r2 between lead variant from multi trait MTAG analysis and lead variant in univariate inverse variance weighted meta-analysis presented in supplementry table 4.
‡ Genome-wide significant in MEGASTROKE and just below genome-wide significance in GIGASTROKE univariate analyses

## Sheet: Suppl.Table10
Supplementary Table 10: Genome-wide significant risk loci for small vessel stroke in a multitrait analysis with white matter hyperintensities
Locus	SNP ID	Coordinates	EA	OA	EAF	MTAG-SVS OR (95% CI)	MTAG-SVS P-value*	SVS OR (95% CI)	SVS P-value	WMH BETA (SE)	WMH P-value	GWS associations in univariate GWAS	METAL (IVW) lead variant	LD in EUR (r2)†
NBEAL1	rs72934589	2:204017937	C	T	0.8729	1.19 (1.14 - 1.24)	1.95635e-14	1.16 (1.1 - 1.23)	6.729e-07	0.06 (0.01)	1.089e-12	AIS (EUR, CROSS-ANC) and AS (EUR, CROSS-ANC)	rs2351524	0.973746
LOC100505841	rs11957829	5:121515195	A	G	0.8344	1.14 (1.1 - 1.19)	4.57002e-11	1.12 (1.06 - 1.19)	4.648e-05	0.05 (0.01)	1.716e-10	AIS (EUR, CROSS-ANC) and AS (EUR, CROSS-ANC)	rs17148926	0.99379
FOXF2	rs76110445	6:1364866	C	T	0.1098	1.17 (1.12 - 1.23)	6.7846e-11	1.19 (1.11 - 1.26)	1.788e-07	0.04 (0.01)	5.441e-06	AIS (EUR, CROSS-ANC) and AS (EUR, CROSS-ANC)	rs79318212	0.952328
HTRA1*	rs79043147	10:124233181	T	C	0.0639	1.19 (1.12 - 1.26)	2.63044e-08	1.16 (1.07 - 1.26)	0.0002311	0.06 (0.01)	4.071e-07	SVS (CROSS-ANC), AIS (EUR, CROSS-ANC) and AS (EUR, CROSS-ANC)	rs60401382	0.0200556
COL4A2†	rs9515201	13:111040798	A	C	0.3104	1.12 (1.08 - 1.15)	2.4762e-11	1.11 (1.06 - 1.16)	2.643e-06	0.04 (0.01)	2.201e-08	SVS (CROSS-ANC), INC_AIS (CROSS-ANC), AIS (EUR, EAS, CROSS-ANC) and AS (EUR, EAS, CROSS-ANC)	rs9515201	same variant
Sorted by genomic location
EA=Effect allele; OA=Other allele; EAF=Effect allele frequency; OR=Odds ratio; 95% CI= 95 percentile confidence interval; CES=Cardioembolic stroke; AF=Arterial fibrilation; IVW=Inverse variance weighted; LD=Linkage disequilibrium
In bold, novel loci for SVS, not GWS in univariate GIGASTROKE European or cross-ancestry GWAS of SVS
*MTAG-SVS P-value<5E-8 suggest genome-wide significant association. The variant must also have p-value<0.05 in univariate association analyses and the MTAG-SVS p-value must be less than an univariate association p-value.
†Linkage disequilibrium in r2 between lead variant from multi trait MTAG analysis and lead variant in univariate inverse variance weighted meta-analysis presented in supplementry table 4.

[truncated: 30 more sheets: Suppl.Table11, Suppl.Table12, Suppl.Table13, Suppl.Table14, Suppl.Table15, Suppl.Table16, Suppl.Table17, Suppl.Table18, Suppl.Table19, Suppl.Table20, Suppl.Table21, Suppl.Table22, Suppl.Table23, Suppl.Table24, Suppl.Table25, Suppl.Table26, Suppl.Table27, Suppl.Table28, Suppl.Table29, Suppl.Table30 …]
