# Supplementary figures and images for: Stroke genetics informs drug discovery and risk prediction across ancestries
Source: Research Square preprint supplement (doi:10.21203/rs.3.rs-1175817/v1), 2022-01-04

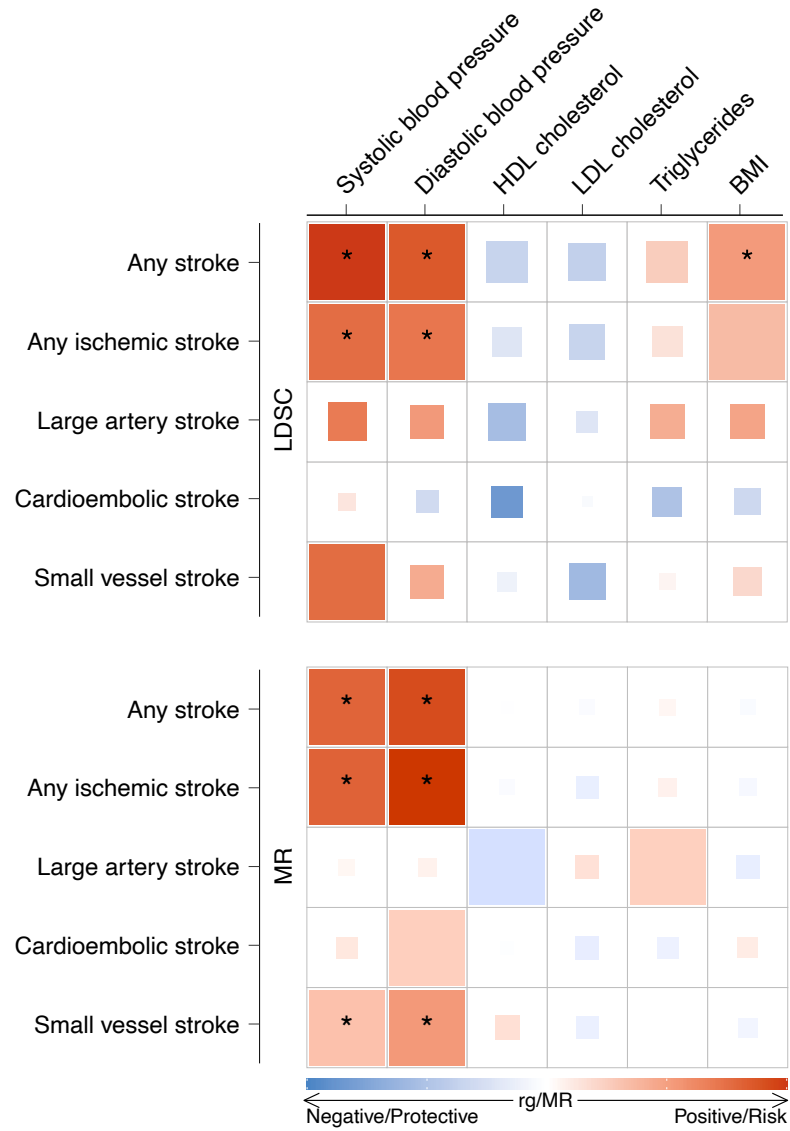

Supplement: Supplementary file 1 [file 1964977f59b101a2b7d5a323.pdf]

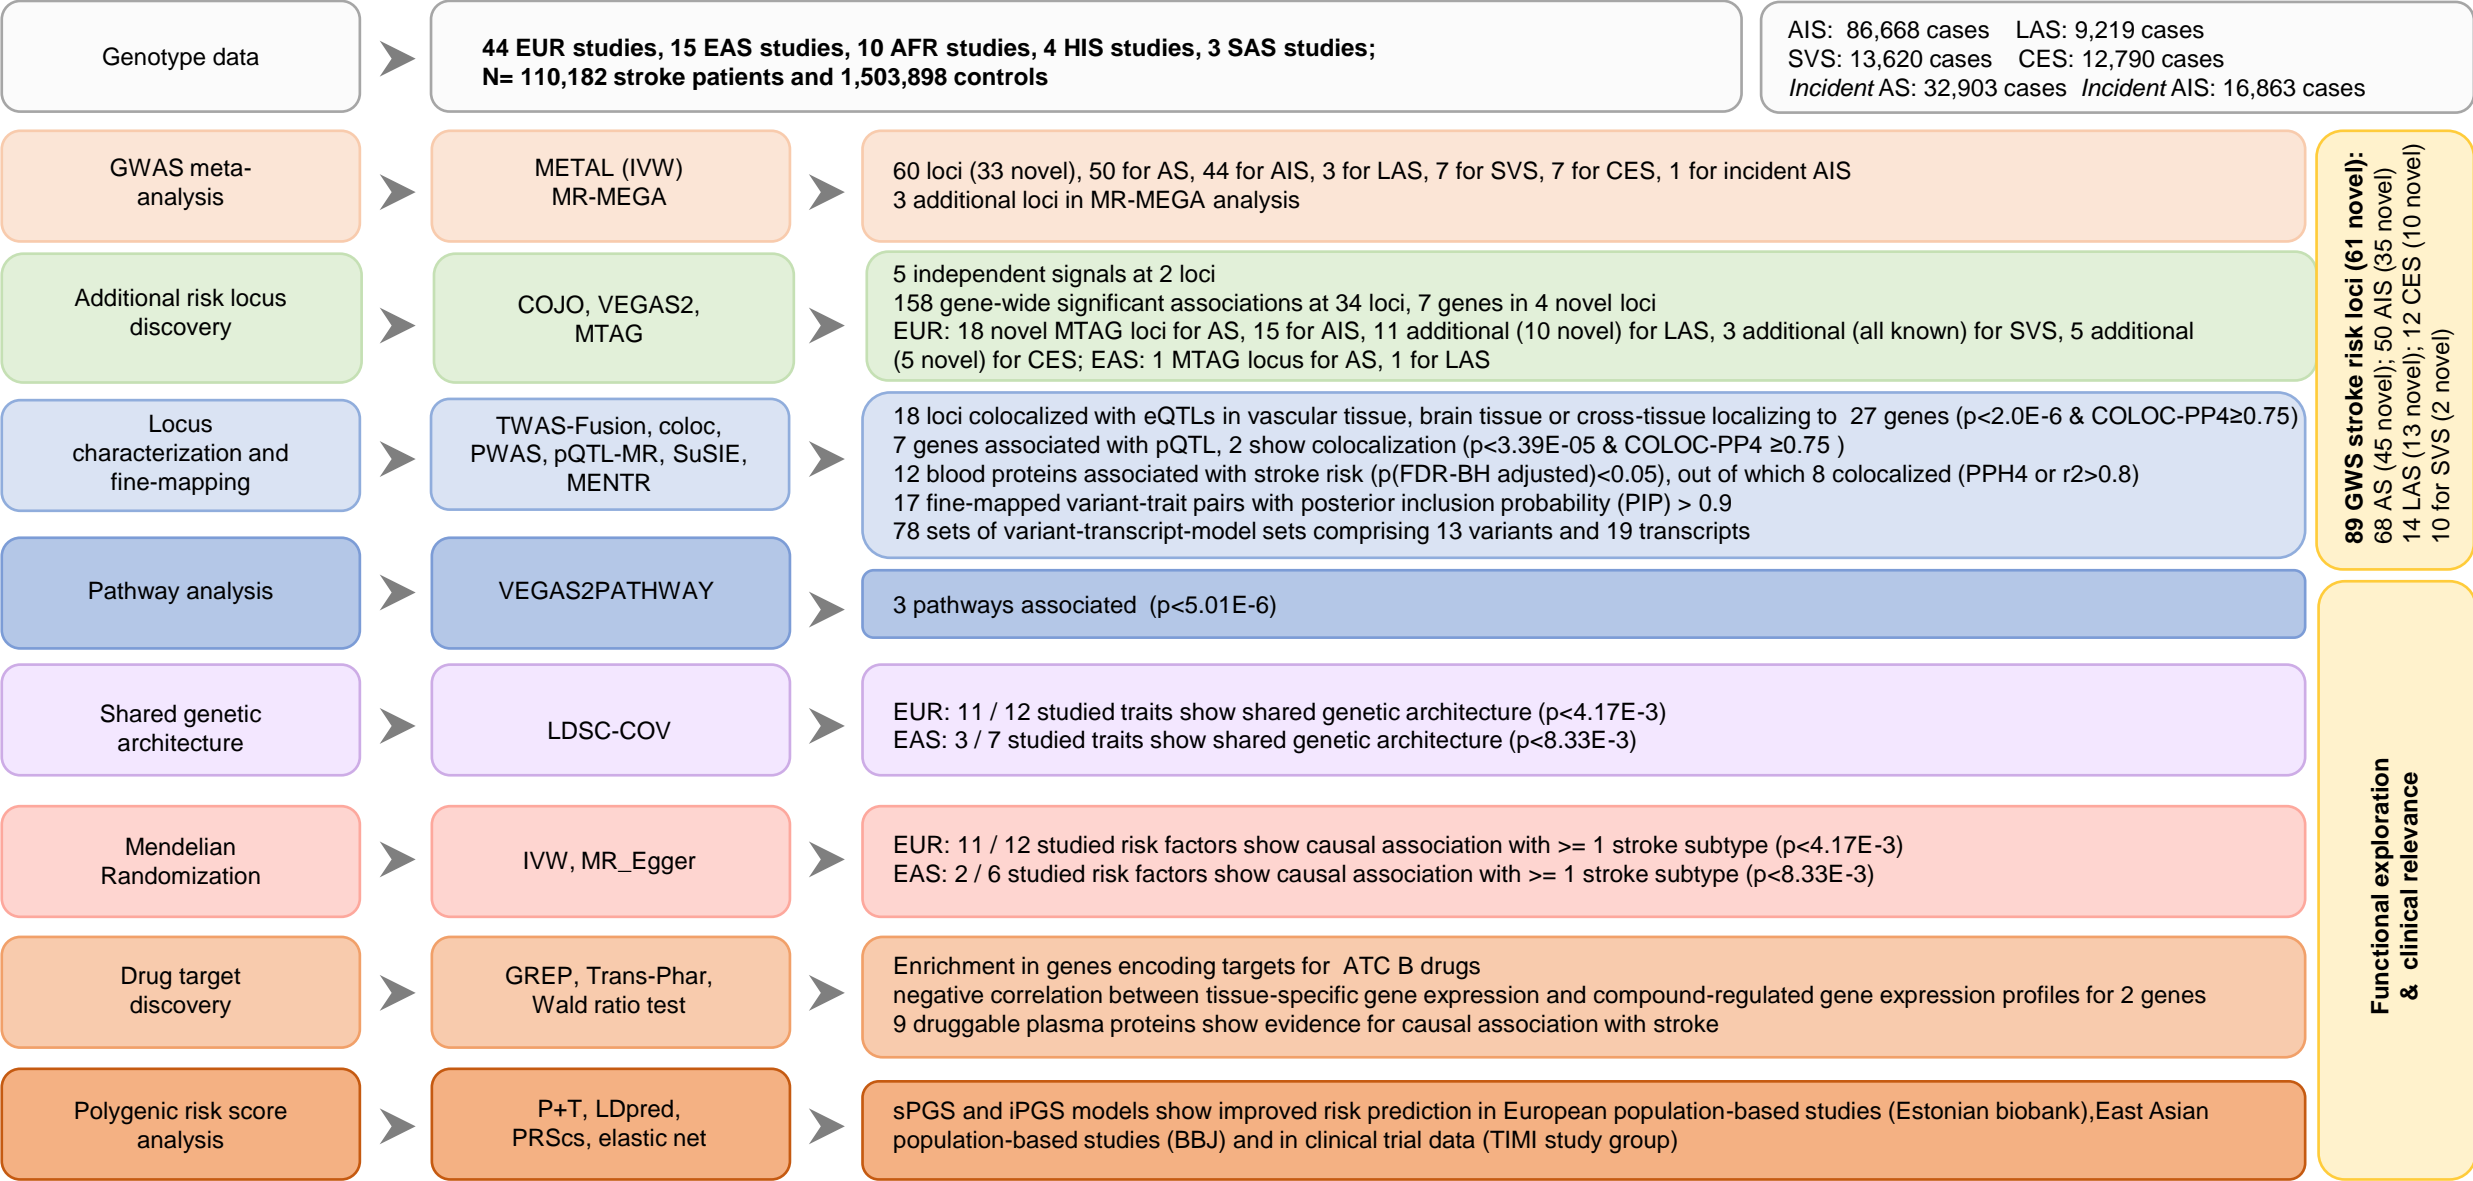

Supplement: Supplementary file 3 [file 8ea881bc5df710298d55e200.pdf]

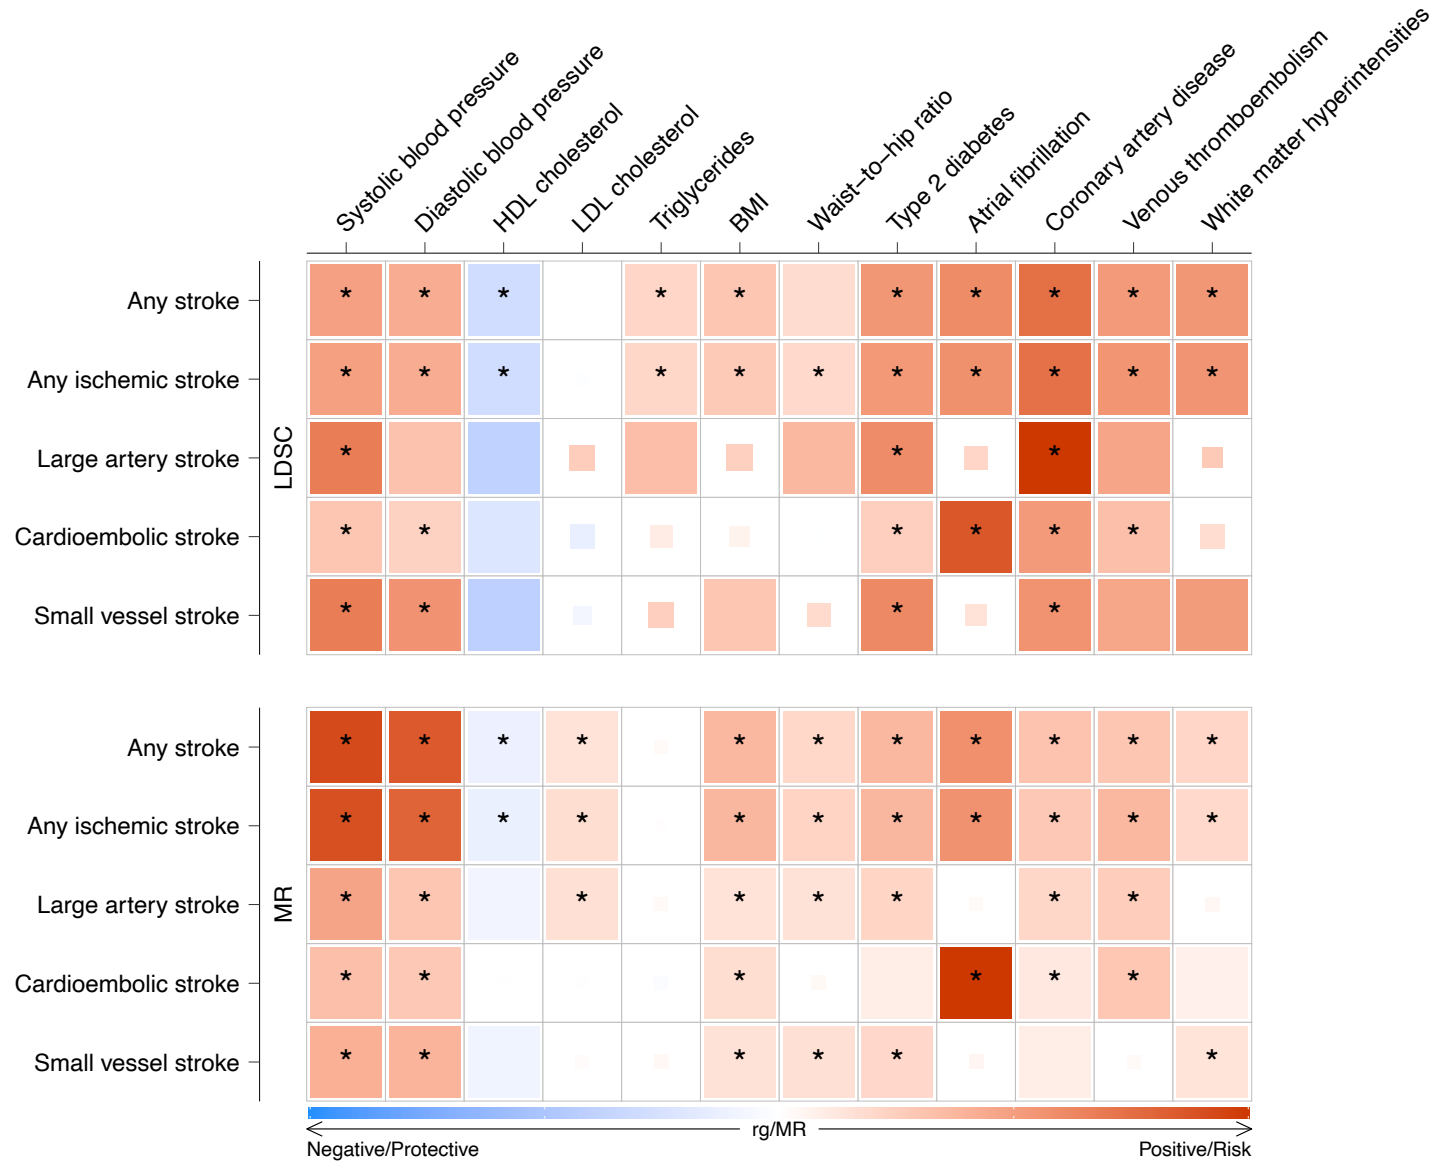

Supplement: Supplementary file 4 [file dfa99f2878da27887839e15e.pdf]
